# Supplementary material for: Draft genome sequence of Solanum aethiopicum provides insights into disease resistance, drought tolerance, and the evolution of the genome
Source: PubMed Central journal article supplement (PMC6771550; doi:10.1093/gigascience/giz115), 2019-10-01

## Draft genome sequence of the *Solanum aethiopicum* provides insights into disease resistance, drought tolerance and the evolution of the genome

--Manuscript Draft--

|                                                      |                                                                                                                                                                                                                                                                                                                                                                                                                                                                                                                                                                                                                                                                                                                                                                                                                                                                                                                                                                                                                                                                                                                                                                                                                                                                                                                                                                                                                                                                                                                                                                                                                                                                                                                                                                                                                                                                                                 |                |
|------------------------------------------------------|-------------------------------------------------------------------------------------------------------------------------------------------------------------------------------------------------------------------------------------------------------------------------------------------------------------------------------------------------------------------------------------------------------------------------------------------------------------------------------------------------------------------------------------------------------------------------------------------------------------------------------------------------------------------------------------------------------------------------------------------------------------------------------------------------------------------------------------------------------------------------------------------------------------------------------------------------------------------------------------------------------------------------------------------------------------------------------------------------------------------------------------------------------------------------------------------------------------------------------------------------------------------------------------------------------------------------------------------------------------------------------------------------------------------------------------------------------------------------------------------------------------------------------------------------------------------------------------------------------------------------------------------------------------------------------------------------------------------------------------------------------------------------------------------------------------------------------------------------------------------------------------------------|----------------|
| <b>Manuscript Number:</b>                            | GIGA-D-19-00026R1                                                                                                                                                                                                                                                                                                                                                                                                                                                                                                                                                                                                                                                                                                                                                                                                                                                                                                                                                                                                                                                                                                                                                                                                                                                                                                                                                                                                                                                                                                                                                                                                                                                                                                                                                                                                                                                                               |                |
| <b>Full Title:</b>                                   | Draft genome sequence of the <i>Solanum aethiopicum</i> provides insights into disease resistance, drought tolerance and the evolution of the genome                                                                                                                                                                                                                                                                                                                                                                                                                                                                                                                                                                                                                                                                                                                                                                                                                                                                                                                                                                                                                                                                                                                                                                                                                                                                                                                                                                                                                                                                                                                                                                                                                                                                                                                                            |                |
| <b>Article Type:</b>                                 | Research                                                                                                                                                                                                                                                                                                                                                                                                                                                                                                                                                                                                                                                                                                                                                                                                                                                                                                                                                                                                                                                                                                                                                                                                                                                                                                                                                                                                                                                                                                                                                                                                                                                                                                                                                                                                                                                                                        |                |
| <b>Funding Information:</b>                          | National Natural Science Foundation of China (No. 31601042)                                                                                                                                                                                                                                                                                                                                                                                                                                                                                                                                                                                                                                                                                                                                                                                                                                                                                                                                                                                                                                                                                                                                                                                                                                                                                                                                                                                                                                                                                                                                                                                                                                                                                                                                                                                                                                     | Dr. Bo Song    |
|                                                      | Science, Technology and Innovation Commission of Shenzhen Municipality (JCYJ20151015162041454)                                                                                                                                                                                                                                                                                                                                                                                                                                                                                                                                                                                                                                                                                                                                                                                                                                                                                                                                                                                                                                                                                                                                                                                                                                                                                                                                                                                                                                                                                                                                                                                                                                                                                                                                                                                                  | Not applicable |
|                                                      | Science, Technology and Innovation Commission of Shenzhen Municipality (JCYJ20160331150739027)                                                                                                                                                                                                                                                                                                                                                                                                                                                                                                                                                                                                                                                                                                                                                                                                                                                                                                                                                                                                                                                                                                                                                                                                                                                                                                                                                                                                                                                                                                                                                                                                                                                                                                                                                                                                  | Not applicable |
|                                                      | Guangdong Provincial Key Laboratory of Genome Read and Write (No. 2017B030301011)                                                                                                                                                                                                                                                                                                                                                                                                                                                                                                                                                                                                                                                                                                                                                                                                                                                                                                                                                                                                                                                                                                                                                                                                                                                                                                                                                                                                                                                                                                                                                                                                                                                                                                                                                                                                               | Dr. Xin Liu    |
| <b>Abstract:</b>                                     | <p><b>Background</b><br/>The African eggplant (<i>Solanum aethiopicum</i>) is a nutritious traditional vegetable used in many African countries, including Uganda and Nigeria. It is believed to have been domesticated in Africa from its wild relative, <i>Solanum anguivi</i>. <i>S. aethiopicum</i> has been routinely used as a source of disease resistance genes for several Solanaceae crops including <i>Solanum melongena</i>. Breeding of <i>S. aethiopicum</i> has lagged behind due to lack of genomic resources.</p> <p><b>Results</b><br/>We assembled a 1.02 Gb draft genome of <i>S. aethiopicum</i>, which contained predominantly repetitive sequences (76.2%). We annotated 37,681 gene models including 34,906 protein-coding genes. We observed an expansion of disease resistance genes through two rounds of amplification of long terminal repeat retrotransposons (LTR-Rs), which may have occurred around 1.25 and 3.5 million years ago, respectively. We identified 14,995,740 SNPs by re-sequencing 65 <i>S. aethiopicum</i> and <i>S. anguivi</i> genotypes, of which 41,046 SNPs were closely linked to disease resistance genes. The domestication and demographic history analysis revealed the active selection for genes involved in drought tolerance in both “Gilo” and “Shum” groups. A pan-genome of <i>S. aethiopicum</i> with a total of 51,351 protein-coding genes was assembled, 7,069 genes of which are missing in the reference genome.</p> <p><b>Conclusions</b><br/>The genome sequence of <i>S. aethiopicum</i> enhances our understanding of its extraordinary biotic and abiotic resistance nature. The SNPs identified will be available for immediate use by breeders. The information provided here will greatly accelerate the selection and breeding of the African eggplant as well as other crops within the Solanaceae family.</p> |                |
| <b>Corresponding Author:</b>                         | Xin Liu, Ph.D.<br>BGI<br>CHINA                                                                                                                                                                                                                                                                                                                                                                                                                                                                                                                                                                                                                                                                                                                                                                                                                                                                                                                                                                                                                                                                                                                                                                                                                                                                                                                                                                                                                                                                                                                                                                                                                                                                                                                                                                                                                                                                  |                |
| <b>Corresponding Author Secondary Information:</b>   |                                                                                                                                                                                                                                                                                                                                                                                                                                                                                                                                                                                                                                                                                                                                                                                                                                                                                                                                                                                                                                                                                                                                                                                                                                                                                                                                                                                                                                                                                                                                                                                                                                                                                                                                                                                                                                                                                                 |                |
| <b>Corresponding Author's Institution:</b>           | BGI                                                                                                                                                                                                                                                                                                                                                                                                                                                                                                                                                                                                                                                                                                                                                                                                                                                                                                                                                                                                                                                                                                                                                                                                                                                                                                                                                                                                                                                                                                                                                                                                                                                                                                                                                                                                                                                                                             |                |
| <b>Corresponding Author's Secondary Institution:</b> |                                                                                                                                                                                                                                                                                                                                                                                                                                                                                                                                                                                                                                                                                                                                                                                                                                                                                                                                                                                                                                                                                                                                                                                                                                                                                                                                                                                                                                                                                                                                                                                                                                                                                                                                                                                                                                                                                                 |                |
| <b>First Author:</b>                                 | Bo Song                                                                                                                                                                                                                                                                                                                                                                                                                                                                                                                                                                                                                                                                                                                                                                                                                                                                                                                                                                                                                                                                                                                                                                                                                                                                                                                                                                                                                                                                                                                                                                                                                                                                                                                                                                                                                                                                                         |                |
| <b>First Author Secondary Information:</b>           |                                                                                                                                                                                                                                                                                                                                                                                                                                                                                                                                                                                                                                                                                                                                                                                                                                                                                                                                                                                                                                                                                                                                                                                                                                                                                                                                                                                                                                                                                                                                                                                                                                                                                                                                                                                                                                                                                                 |                |

|                                                |                                                                                                                                                                                                                                                                                                                                                                                                                                                                                                                                                                                                                                                                                                                                                                                                                                                                                                                                                                                                                                                                                                                                                                                                                                                                                                                                                                                                                             |
|------------------------------------------------|-----------------------------------------------------------------------------------------------------------------------------------------------------------------------------------------------------------------------------------------------------------------------------------------------------------------------------------------------------------------------------------------------------------------------------------------------------------------------------------------------------------------------------------------------------------------------------------------------------------------------------------------------------------------------------------------------------------------------------------------------------------------------------------------------------------------------------------------------------------------------------------------------------------------------------------------------------------------------------------------------------------------------------------------------------------------------------------------------------------------------------------------------------------------------------------------------------------------------------------------------------------------------------------------------------------------------------------------------------------------------------------------------------------------------------|
| <b>Order of Authors:</b>                       | <p>Bo Song</p> <p>Yue Song</p> <p>Yuan Fu</p> <p>Elizabeth Balyejusa Kizito</p> <p>Pamela Nahamya Kabod</p> <p>Sandra Ndagire Kamenya</p> <p>Huan Liu</p> <p>Samuel Muthemba</p> <p>Robert Kariba</p> <p>Xiuli Li</p> <p>Sibo Wang</p> <p>Shifeng Cheng</p> <p>Alice Muchugi</p> <p>Ramni Jamnadass</p> <p>Howard Yana-Shapiro</p> <p>Allen Van Deynze</p> <p>Huanming Yang</p> <p>Jian Wang</p> <p>Xun Xu</p> <p>Damaris Achieng Odeny</p> <p>Xin Liu, Ph.D.</p>                                                                                                                                                                                                                                                                                                                                                                                                                                                                                                                                                                                                                                                                                                                                                                                                                                                                                                                                                           |
| <b>Order of Authors Secondary Information:</b> |                                                                                                                                                                                                                                                                                                                                                                                                                                                                                                                                                                                                                                                                                                                                                                                                                                                                                                                                                                                                                                                                                                                                                                                                                                                                                                                                                                                                                             |
| <b>Response to Reviewers:</b>                  | <p>Reviewer reports:</p> <p>Reviewer #1: The manuscript entitled "Draft genome sequence of the Solanum aethiopicum provides insight into disease resistance, drought tolerance and evolution" is a genomic study of Solanum aethiopicum, a close relative of the cultivated eggplant Solanum melongena. Methods are very appropriate to the aims of the study and conclusions are adequately supported by the genomic data.</p> <p>Could you give more details about the method of:</p> <ul style="list-style-type: none"> <li>- The high molecular genomic DNA extraction?<br/>Response: More details and the cited reference were added.</li> <li>- The selection of high-quality reads?<br/>Response: Details have been added.</li> <li>- The multiplexing? (barcoding?) and the demultiplexing?<br/>Response: The delivered reads were already demultiplexed.</li> <li>- The identification of collinearity blocks (parameters of MCscanX)?<br/>Response: Changed to "... gene pairs in MCscanX with default parameters".</li> <li>- The RNAseq read filtering and removing of low-quality reads (tools, parameters and threshold)?<br/>Response: Details have been added in the text. "SOAPfilter software with the parameters "-M 2, -f 0, -p" was used to filter low quality reads and adapter sequence. Also reads with &gt;=40% low quality bases or with &gt;=10% uncalled bases ("N") were filtered."</li> </ul> |

- The variant calling pipeline? (default parameters in GATK for SNP and SV?)  
Response: Yes, we used default parameters in GATK pipeline for SNP and SV identified. For quality control, parameters “GENO>0.05, MAF<0.1, HWE test p-value <=0.0001” was used. Detailed parameters have been added.

- The pan-genome reconstruction (parameters and threshold of SOAPdenovo2 and CD-HIT-EST)?  
Response: We use SOAPdenovo2 and CD-HIT-EST software to construct pan-genome with default parameters.

Minor comments:

- Could you describe the eggplant accession used to produce the genome assembly?  
Response: A brief description had been added.

- You have used a substitution rate of 1.3e-8 year-1site-1 based on works performed on rice genomes. Could you justify this?  
Response: Generally, the substitution rate varies little among different plants. For example, the substitution rate reported in Arabidopsis is  $7 \times 10^{-9}$  base substitutions per site per generation (Ossowski et al, 2010), which is quite close to that in rice. The use of the rate of rice enables the comparison between our study and another study of hot pepper, in which the same substitution rate was used to infer the ages of LTRs (Kim et al., 2017).

- Could you perform a statistical test to validate the comparison of degeneration of LTR-R activities in different tissues?  
Response: Unfortunately, statistical test is not allowed without replicates. Instead, we added regression onto the plots.

- An amplification of LTR is found in Solanum aethiopicum and also in Solanum melongena. Could you give us the reference?  
Response: We searched for LTR in S. melongena genome (Hirakawa et al., 2014) in this study. A same method and criteria were used in both the genomes so that the results are comparable.

- The number of SNP seems huge. Could you compare with others plant genomes? (Yuan Fu)  
Response: In this study, we had identified 18,614,838 SNPs in total. The number of SNP is highly dependent on the variations between the accessions used in different studies. The differences of genome sizes also contribute to the varied number of SNP in different species. Actually, it is not fair to compare the number of SNPs between different species and populations. Take tomato, whose genome size (828 Mb) is comparable to S. aethiopicum, as an example, a number of 11,620,517 SNPs and 1,303,213 small indels were identified in a population of 360 accessions (Lin et al., 2014). Furthermore, it is not surprise to have such a large number of SNPs in S. aethiopicum because it is a hypervariable species (Lester et al., 1986).

- "Artificially selected genes", what does the term artificial mean? Could you explain/develop?  
Response: It means the genes preferentially retained by human during the history of domestication.

- Numbers of accessory genes seem huge. Could you check if these values are not overestimate due to the presence of fragmented genes?  
Response: The genome sequences per se varies greatly among different groups (Lester et al., 1986), several groups were previously recognized as different species. Although we cannot completely exclude the possibility of overestimation caused by the presence of fragmented genes, the degree of overestimation is minor because the length of CDS of accessory genes (921 bp) (Supplementary Table 20) is comparable to that of genes (1104 bp) (Supplementary Table 5) in reference.

- "Good quality transcripts" ", what does the term good mean? Could you explain/develop?  
Response: It has been rephrased to “The mapped reads were then assembled using

StringTie”

- Could you justify the choice of e-value thresholds for gene annotations and gene clustering (1e-4 seems very weak)?

Response: The cutoff of 1e-4 was used for the identification of NLR. It is actually not that weak and had been used in many other studies (Seo et al., 2016 and Kim et al., 2017). Another reason we use this threshold is to make our results comparable to that reported in pepper (Kim et al., 2017), which used a threshold of e-value  $\leq 1e-4$ .

- Could you explain acronyms (GENO, MAF, HWE)?

Response: The full names have been added in the manuscript. They are GENO: Maximum per-SNP missing, MAF: Minor allele frequency, HWE: Hardy-Weinberg disequilibrium p-value.

Reviewer #2: This paper reports the first genome assembly of *Solanum aethiopicum*. The description is easy to follow and the data would be useful for the breeding programs of eggplant. I recommend the authors to submit the data (genome, genes, protein, annotation, sequence variations etc) to Sol Genomics Network <<https://solgenomics.net>> so that potential users can access them easily.

Response: Thanks. That's a very good suggestion. We will arrange the submission upon the acceptance of the paper.

Minor comments:

The term "the reference genome" in the main text should be replaced by "the reference genome sequence".

Response: Replaced. Thanks.

Abstract: LTR-Rs should be spelled out.

Response: Replaced by "long terminal repeat retrotransposons (LTR-Rs)". Thanks. (P2, L12)

Abstract: "closely" is ambiguous.

Response: It is 150 kb. It had been indicated in the text.

Introduction: "We also re-sequenced two ...". Is this 65 (not two) as mentioned in Abstract and other parts?

Response: Changed to "two groups"

Data Description: While a total of 242.6 Gb raw reads were obtained, only 127.83 Gb were used for assembly. I assume that approximately 115 Gb reads were low quality. Correct?

Response: Yes, the quality of several of the libraries were poor at the beginning of this work, therefore we added more libraries to make sure the final clean data is sufficient.

Data Description: Only 80.4% complete BUSCOs were found in the assembly, whereas the total length of the assembly was 1.02 Gb covering 87% of the estimated genome size (1.17 Gb). Please clarify the reason for the low BUSCOs. (Yuan Fu, please explain this)

Response: We won't deny that this assembly is only a draft and there must be some genes and sequences missed. In order to keep only the most reliable predictions of gene models, we used much more stringent criteria for gene annotation, compared to many other studies on Solanaceae genomes, resulting in a smaller but more accurate gene set. For example, the genome of *Solanum melongena* has as many as 85,446 genes (Hirakawa et al, 2014). In fact, the scores of BUSCO assessment can be increased by relaxing the criteria for gene annotation. However, this will also include more inaccurate gene models. We had other version of gene sets with higher scores but we finally selected this one hoping to removing false annotations as many as possible.

Increased resistance is facilitated by LTR-Rs amplification: What is the definition of "LTR-Rs captured"? It is unclear why the "LTR-Rs captured" genes enhance disease resistance.



NLR?

Response: The genes located in LTR-Rs were defined as LTR-Rs captured genes. It is likely that these genes were retroposed by the retrotransposition of LTR-Rs. As these genes are overrepresented by NLRs, we speculate that they are beneficial to disease resistance.

Polymorphisms in different *S. aethiopicum* groups: What's the difference between indels and SVs?

Response: In this study, we follow the criteria described in the users' guide of GATK pipeline (version 4.0), in which SV is considered to be structural variant, while indel is defined as short variants including small deletion or insertions.

Artificially selected genes in *S. aethiopicum*: What types of selections do the authors mention here?

Response: They are the genes preferentially retained by human during the domestication of this crop.

Potential implications: This part can be deleted because this is not based on the data.  
Response: removed.

Methods: What are the "standard BGI protocols"?

Response: Changed to "The DNA was sheared into small fragments of ~ 200 bp and used to construct paired-end libraries following standard BGI protocols as described in (Mak et al., 2017) and subsequently sequenced on a BGI-500 sequencer. Briefly, the DNA fragments were ligated to BGISEQ-500 compatible adapters, followed by an index PCR amplification, the products of which were then pooled and circularized for sequencing on BGISEQ-500 (BGI, Shenzhen, China).

SNP calling: "samtools mpileup" and "VariantFiltration" are duplicated.

Response: Corrected.

Reviewer #3: The manuscript describes a draft assembly and annotation for *S. aethiopicum* genome.

Authors estimated the repetitive elements content and proposed that two amplifications of LTR-Rs occurred around 1.25 and 3.5 million years ago, resulting in the expansion of resistance genes. Authors carried out also comparative genomics study in the Solanaceae family and inferred phylogenetic studies as well as the domestication history of *S. aethiopicum* and LD.

Although *S. aethiopicum* is an orphan species and therefore I do not expect the use of the most advanced technologies for assembly such as PacBio and chromosome scaffolding with HiC, I would have expected at least the anchoring of scaffolds and contigs to pseudomolecules. I think that generating an F2 mapping population for *S. aethiopicum* is easy to obtain, which could be thus genotyped using any GBS approach authors want.

Response: These are very good suggestions. Unfortunately, we do not have extra budget for this at this moment. Of course, the reference will be further improved and updated once these data are available.

Although a pan genome of the species was also provided, I think that this paper is not suitable for the publication on this journal.

Furthermore, the language needs tightening up and editing for English sense.

Response: The language has been polished.

More detailed comments

Abstract:

it is reported that the pan-genome of *S. aethiopicum* contains 1,345 genes are missing in the reference genome. I cannot find this in the main text.

Response: The figures in this part have been corrected. Now it has been changed to "A pan-genome of *S. aethiopicum* with a total of 51,351 protein-coding genes was assembled, of which 24,567 genes are missing in the reference genome sequence." It has also been added in the text.

## Background

Line 8-10: I would add some extra reference to this part "It is reported to have medicinal value and its roots and fruits have been used to treat colic, high blood pressure and uterine complications in Africa" or clearly highlighted the information got from FAO. Furthermore, FAO should be added to reference list

Response: The publication of these orphan crops is very few, we could only find this information on the website of FAO ([http://www.fao.org/traditional-crops/africangardenegg/en/?amp%3Butm\\_medium=social%20media&%3Butm\\_campaign=unfaopinterest](http://www.fao.org/traditional-crops/africangardenegg/en/?amp%3Butm_medium=social%20media&%3Butm_campaign=unfaopinterest)), which had already been added to reference list.

Line 24 is ([mansfeld.ipk-gatersleben.de](http://mansfeld.ipk-gatersleben.de)). is it a reference for disease resistance? The link send to a database. I would change it with some references from literature.

Response: The full address is [http://mansfeld.ipk-gatersleben.de/apex/f?p=185:46:448783208481::NO::module,mf\\_use,source,akzanz,rehm,akzname,taxid:mf,,botnam,0,,Solanum%20aethiopicum%20Aculeatum%20Group,5898](http://mansfeld.ipk-gatersleben.de/apex/f?p=185:46:448783208481::NO::module,mf_use,source,akzanz,rehm,akzname,taxid:mf,,botnam,0,,Solanum%20aethiopicum%20Aculeatum%20Group,5898), which is too long and only the website of home page was shown.

Now, we changed it to "Aculeatum is used as ornamentals (Prohens et al., 2012; Plazas et al., 2014) or rootstocks ([mansfeld.ipk-gatersleben.de](http://mansfeld.ipk-gatersleben.de)) due to its excellent disease resistance nature (Toppino et al., 2008)"

line 28: please provide at least a reference for this part:"S. aethiopicum is the second most cultivated eggplant, as an "orphan crop"

Response: This statement has been changed to "Although S. aethiopicum is one of the most important cultivated eggplants in Africa, it remains an "orphan crop" because research and breeding investments are substantially lagging behind in comparison with other Solanaceae relatives such as tomato, potato and eggplant."

Line 40 : the sentence on genome editing sound to me a little bit out of place, as no information on genome editing in scarlet aethiopicum is available. I would point out that genome editing might be used for breeding.

Response: We noticed that there is no report of genome editing in S. aethiopicum so far. This is because very few efforts have been paid to it. However, we believe that these techniques, just like many other advanced techniques, can eventually be applied into this species to speed the progress of breeding. When these platforms are ready, the sequence of genome would be very essential for the identification of genes to be edited, as well as for the design of guide RNAs. This strategy had been proved to be very efficient in a report on *Physalis pruinose*, another orphan crop also in Solanaceae (Lemmon et al., 2018. *Nat. Plants*), before which there is not available genome editing example either.

## Data description:

I would modify "with a genome size of 1.17 Gb" with "expected genome size". You would get a more precise estimate using flow-cytometry.

Response: Changed.

Furthermore, authors generated more than 242Gb of data, but after cleaning, about 50% of the data (128GB) were used for assembly, which is a quite high percentage. This presumably may explain the number of scaffolds obtained (more than 162k). Did the authors filter for scaffolds' size? Did the authors try to assembly the genome sequence with other tools, like SOAP? Any comments?

Response: Yes, the quality of several of the libraries were poor, therefore we added more libraries to make sure the final clean data is sufficient. We also had tried to assembly the genome using other tools including SOAPdenovo and selected the best assembly for downstream analyses. The assembler automatically filtered out the scaffolds smaller than 100 bp, and all the resulted scaffolds were retained.

Line 33-39. This sentence "Among these annotated TEs, LTR-Rs were extraordinarily abundant and occupied 719 Mbp, accounting for approximately 70% of the genome, followed by LINES and SINEs (Supplementary Table S4)." is a repetition of what said at the beginning of the paragraph. I will combine the two sentences.

Response: We have deleted this sentence. Thanks.

Line 42 Section protein coding. From table S5 gene features are not so similar to other genomes, especially Pepper and Arabidopsis. Furthermore, why pepper has more than 45k genes? The gene number from Kim et al. 2017 is 35,884

Response: Arabidopsis is relatively distant to *S. aethiopicum*. As for the data of Pepper, the data in this table was collected from NCBI (version GCA\_000710875.1), which has a total of 45,131 protein-coding genes. The data now has been replaced by Kim's data (Kim et al, 2017).

Section Amplification of LTR-Rs:

\* please add references here "The proportion of Ty3/Gypsy and Ty1/Copia LTR-Rs in *S. aethiopicum* is also comparable to those reported in other Solanaceae genomes." Response: The references were added. The sentence was rephrased to "The proportion of Ty3/Gypsy in *S. aethiopicum* is also comparable to what is reported in the hot pepper genome (87.7% of Ty3/Gypsy in hot pepper)".

\* Line 19: In this part "they occurred separately in each genome since *S. aethiopicum* and hot pepper had split about 20 MYA (Figure 1A), and about 4 MYA between *S. aethiopicum* and tomato (Figure 1A)." authors stated that *S. aethiopicum* separated from tomato 4 million years ago. This sound strange. *S. aethiopicum* did not separated from tomato 4 MYA, but only the ancestors of tomato/potato and eggplant/scarlet eggplant, which occurred around 16MYA.

Response: Changed to "they occurred separately in each genome since the ancestor of *S. aethiopicum* had diverged from that of hot pepper and tomato about 20 MYA and 4 MYA, respectively".

Furthermore, the second LTR burst occurred 1.25MYA was also shared by eggplant?

Response: No, but eggplant has a burst more recently, about 0.5 MYA (Figure 2A)

Polymorphisms in different *S. aethiopicum* groups section:

Concerning the ADMIXTURE analysis and results, I wonder why authors did not define accessions belonging for less than, let's say 70%, to a group as admixed.

Response: The accessions were clustered using ADMIXTURE following the methods previously described in (Mathieson et al. 2017; Olalde et al., 2017; Mittnik et al., 2017), and we did not see an example in which accessions were grouped as suggested.

Artificially selected genes in *S. aethiopicum*

I would have expected, at least for the 12 genes in common between Gilo and Shum (and maybe for the 36 selected genes in Shum), some more information. What genes are they?

Response: The functional descriptions have been listed in a new table, Supplementary Table 18.

Go enrichments are nice but sometimes it would be better to provide some more details, especially if the number of genes involved are limited.

Response: Added

Pan-genome section

\* Why did the authors get less contigs for Anguivi? The sequencing performance are quite good for the 5 accessions of this species.

Response: The contigs were assembled separately for each individual, Anguivi had fewer contigs only because the number of Anguivi accessions used in this study is small (5 for Anguivi, and 24 for Gilo and 36 for Shum)

\* I am quite confused on the metrics (Supplementary table S20). In the text, it is reported that 41,626, 22,942 and 17,726 protein-coding genes for "Shum", "Gilo" and "S. anguivi", respectively were predicted, among which accessory gene sets of 29,389, 23,726 and 12,829 for "Shum", "Gilo" and "S. anguivi", respectively were found. These numbers are not the same in S20 table, presumably two columns were switched.

Furthermore in the table S22 for Gilo, a total of 33,194 gene are reported, while in the text the number is 22,942. Accessory genes in the text for Gilo are less than the ones predicted (as reported in the text).

\* Table S20, I will add the unit of measurement for length

|                                                                                                                                                                                                                                                                                                                                                                                                                                    |                                                                                                                                                                                                                                                                                                                                                                                                                                                                                                                                                                                                                                                                                                                                                                                                                                                                                                                                                                                                                                                                                                                                                                                                                                                                                                                                                                                                                                                                                                                                                                                                                                                                                                                                                                                                                                                                                                                                                   |
|------------------------------------------------------------------------------------------------------------------------------------------------------------------------------------------------------------------------------------------------------------------------------------------------------------------------------------------------------------------------------------------------------------------------------------|---------------------------------------------------------------------------------------------------------------------------------------------------------------------------------------------------------------------------------------------------------------------------------------------------------------------------------------------------------------------------------------------------------------------------------------------------------------------------------------------------------------------------------------------------------------------------------------------------------------------------------------------------------------------------------------------------------------------------------------------------------------------------------------------------------------------------------------------------------------------------------------------------------------------------------------------------------------------------------------------------------------------------------------------------------------------------------------------------------------------------------------------------------------------------------------------------------------------------------------------------------------------------------------------------------------------------------------------------------------------------------------------------------------------------------------------------------------------------------------------------------------------------------------------------------------------------------------------------------------------------------------------------------------------------------------------------------------------------------------------------------------------------------------------------------------------------------------------------------------------------------------------------------------------------------------------------|
|                                                                                                                                                                                                                                                                                                                                                                                                                                    | <p>* I cannot find Supplementary Table S21 and S22<br/> Response: The two columns were switched in Supplementary table 21 (previous supplementary table 20) and we forgot to add supplementary table 22 and 23. We have corrected the errors and add the unit of measurement for length.</p> <p>Methods<br/> Gene family analysis: References for the 5 proteomes used are missing, as well as the version used<br/> Response: The references and version of the data have been added.</p> <p>NLR genes: it is not clear to me how the NLR genes were identified. In methods is reported that specific NB-ARC HMM model was constructed, but in the text it is reported that NBS-LRR genes were identified.<br/> How did the authors performed the identification of other Motifs (TIR, CC and LRR)?<br/> Response: The “NBS-LRR gene” in the text was supposed to be “NB-containing genes”. We counted the number of “NB-containing genes” because, even without LRR motif, NB-containing genes can also function in plant immunity (Nandety et al., 2013).</p> <p>SNP calling: which parameters did the authors use for SNP identification? Besides MAF and GENO parameters, I would also have considered sequencing depth as a key parameter for the final SNPs set.<br/> Response: Yes, sequencing depth is critical. Actually, the depth had been considered, and it is not a problem because the sequencing depth for each accession is averagely higher than 60 X in our work.</p> <p>Population analyses. I would add bootstrap values to the figure 5A<br/> Response: As the branches in the figure are too short, we added the phylogenetic tree with bootstrap in supplementary figure 4.</p> <p>Furthermore, is the reference for Itools (80) correct?<br/> Response: The software itools used in our research has been changed to a new name, called ReSeqTools. We have changed it to the correct software name in our article.</p> |
| <b>Additional Information:</b>                                                                                                                                                                                                                                                                                                                                                                                                     |                                                                                                                                                                                                                                                                                                                                                                                                                                                                                                                                                                                                                                                                                                                                                                                                                                                                                                                                                                                                                                                                                                                                                                                                                                                                                                                                                                                                                                                                                                                                                                                                                                                                                                                                                                                                                                                                                                                                                   |
| <b>Question</b>                                                                                                                                                                                                                                                                                                                                                                                                                    | <b>Response</b>                                                                                                                                                                                                                                                                                                                                                                                                                                                                                                                                                                                                                                                                                                                                                                                                                                                                                                                                                                                                                                                                                                                                                                                                                                                                                                                                                                                                                                                                                                                                                                                                                                                                                                                                                                                                                                                                                                                                   |
| Are you submitting this manuscript to a special series or article collection?                                                                                                                                                                                                                                                                                                                                                      | No                                                                                                                                                                                                                                                                                                                                                                                                                                                                                                                                                                                                                                                                                                                                                                                                                                                                                                                                                                                                                                                                                                                                                                                                                                                                                                                                                                                                                                                                                                                                                                                                                                                                                                                                                                                                                                                                                                                                                |
| <p><b>Experimental design and statistics</b></p> <p>Full details of the experimental design and statistical methods used should be given in the Methods section, as detailed in our <a href="#">Minimum Standards Reporting Checklist</a>. Information essential to interpreting the data presented should be made available in the figure legends.</p> <p>Have you included all the information requested in your manuscript?</p> | Yes                                                                                                                                                                                                                                                                                                                                                                                                                                                                                                                                                                                                                                                                                                                                                                                                                                                                                                                                                                                                                                                                                                                                                                                                                                                                                                                                                                                                                                                                                                                                                                                                                                                                                                                                                                                                                                                                                                                                               |
| <p><b>Resources</b></p> <p>A description of all resources used,</p>                                                                                                                                                                                                                                                                                                                                                                | Yes                                                                                                                                                                                                                                                                                                                                                                                                                                                                                                                                                                                                                                                                                                                                                                                                                                                                                                                                                                                                                                                                                                                                                                                                                                                                                                                                                                                                                                                                                                                                                                                                                                                                                                                                                                                                                                                                                                                                               |

|                                                                                                                                                                                                                                                                                                                                                                                                                                                                                                                                                         |            |
|---------------------------------------------------------------------------------------------------------------------------------------------------------------------------------------------------------------------------------------------------------------------------------------------------------------------------------------------------------------------------------------------------------------------------------------------------------------------------------------------------------------------------------------------------------|------------|
| <p>including antibodies, cell lines, animals and software tools, with enough information to allow them to be uniquely identified, should be included in the Methods section. Authors are strongly encouraged to cite <a href="#">Research Resource Identifiers</a> (RRIDs) for antibodies, model organisms and tools, where possible.</p> <p>Have you included the information requested as detailed in our <a href="#">Minimum Standards Reporting Checklist</a>?</p>                                                                                  |            |
| <p><b>Availability of data and materials</b></p> <p>All datasets and code on which the conclusions of the paper rely must be either included in your submission or deposited in <a href="#">publicly available repositories</a> (where available and ethically appropriate), referencing such data using a unique identifier in the references and in the “Availability of Data and Materials” section of your manuscript.</p> <p>Have you have met the above requirement as detailed in our <a href="#">Minimum Standards Reporting Checklist</a>?</p> | <p>Yes</p> |

[Click here to view linked References](#)

Song B, Song Y, Fu et al.

The African eggplant draft genome

---

1 **Draft genome sequence of *Solanum aethiopicum* provides insights into disease**  
2 **resistance, drought tolerance and the evolution of the genome**

3 Bo Song<sup>1,2,3</sup>, ‡(0000-0003-1102-2814), Yue Song<sup>1,3,4</sup>, ‡(0000-0002-2974-6442), Yuan  
4 Fu<sup>1,2</sup>, ‡(0000-0002-3867-1219), Elizabeth Balyejusa Kizito<sup>5</sup>(0000-0003-2558-8309),  
5 Sandra Ndagire Kamenya<sup>5,6</sup>, Pamela Nahamya Kabod<sup>5</sup>, Huan Liu<sup>1,2,3</sup>(0000-0003-3909-  
6 0931), Samuel Muthemba<sup>7</sup>(0000-0003-3311-8489), Robert Kariba<sup>7</sup>(0000-0003-0242-  
7 4547), Joyce Njuguna<sup>6</sup>, Solomon Maina<sup>6</sup>(0000-0003-0205-8567), Francesca  
8 Stomeo<sup>6,8</sup>(0000-0003-1776-6128), Appolinaire Djikeng<sup>6,9</sup>, Prasad S. Hendre<sup>7</sup>(0000-  
9 0003-1691-183X), Xiaoli Chen<sup>1,2</sup>(0000-0002-4878-1905), Wenbin Chen<sup>1,2</sup>, Xiuli Li<sup>1,2</sup>,  
10 Wenjing Sun<sup>1,2</sup>, Sibao Wang<sup>1,3</sup>, Shifeng Cheng<sup>1,2</sup>, Alice Muchugi<sup>7</sup>, Ramni  
11 Jamnadass<sup>7</sup>(0000-0003-2416-8361), Howard-Yana Shapiro<sup>7,10,11</sup>, Allen Van  
12 Deynze<sup>10</sup>(0000-0002-2093-0577), Huanming Yang<sup>1,2</sup>, Jian Wang<sup>1,2</sup>, Xun Xu<sup>1,2,3</sup>(0000-  
13 0002-5338-5173), Damaris Achieng Odeny<sup>12,\*</sup>(0000-0002-3629-3752) and Xin  
14 Liu<sup>1,2,3,\*</sup>(0000-0003-3256-2940)

15 <sup>1</sup> BGI-Shenzhen, Beishan Industrial Zone, Yantian District, Shenzhen 518083, China; <sup>2</sup>  
16 China National GeneBank, BGI-Shenzhen, Jinsha Road, Shenzhen 518120, China; <sup>3</sup> State  
17 Key Laboratory of Agricultural Genomics, BGI-Shenzhen, Shenzhen 518083, China; <sup>4</sup> BGI-  
18 Qingdao, BGI-Shenzhen, Qingdao 266555, China; <sup>5</sup> Uganda Christian University, Bishop  
19 Tucker Road, Box 4, Mukono, Uganda; <sup>6</sup> Biosciences Eastern and Central Africa (BeCA) –  
20 International Livestock Research Institute (ILRI) Hub, P.O. Box 30709 Nairobi, 00100  
21 Kenya; <sup>7</sup> African Orphan Crops Consortium, World Agroforestry Centre (ICRAF), Nairobi,

22 Kenya;<sup>8</sup> Present address: European Molecular Biology Laboratory (EMBL), Heidelberg,  
23 Germany;<sup>9</sup> Present address: Centre for Tropical Livestock Genetics and Health (CTLGH),  
24 University of Edinburgh, Edinburgh EH25 9RG, UK;<sup>10</sup> University of California, 1 Shields  
25 Ave, Davis, CA, USA;<sup>11</sup> Mars, Incorporated, 6885 Elm Street, McLean, Virginia, 22101,  
26 USA;<sup>12</sup> International Crops Research Institute for the Semi-Arid Tropics (ICRISAT) –  
27 Eastern and Southern Africa, P.O. Box 39063, Nairobi 00623 Kenya

28 ‡ Equal contribution

29 \*Correspondence address. Xin Liu. BGI-Shenzhen, Beishan Industrial Zone, Yantian  
30 District, Shenzhen 518083, China. Tel: +86-180-2546-0332; E-mail:  
31 liuxin@genomics.cn

32 Damaris Achieng Odeny. P.O Box 39063 – 00623, Nairobi, Kenya Tel: +254 20  
33 7224559; E-mail: D.Odeny@cigar.org

34

## 35 **Abstract**

36 **The African eggplant (*Solanum aethiopicum*) is a nutritious traditional vegetable**  
37 **used in many African countries, including Uganda and Nigeria. It is thought to**  
38 **have been domesticated in Africa from its wild relative, *S. anguivi*. *S. aethiopicum***  
39 **has been routinely used as a source of disease resistance genes for several**  
40 **Solanaceae crops, including *S. melongena*. A lack of genomic resources has meant**  
41 **that breeding of *S. aethiopicum* has lagged behind other vegetable crops. We**  
42 **assembled a 1.02 Gb draft genome of *S. aethiopicum*, which contained**



43 **predominantly repetitive sequences (76.2%). We annotated 37,681 gene models,**  
44 **including 34,906 protein-coding genes. Expansion of disease resistance genes was**  
45 **observed via two rounds of amplification of long terminal repeat retrotransposons,**  
46 **which may have occurred around 1.25 and 3.5 million years ago, respectively. By**  
47 **re-sequencing 65 *S. aethiopicum* and *S. anguivi* genotypes, 14,995,740 single**  
48 **nucleotide polymorphisms (SNPs) were identified, of which 41,046 were closely**  
49 **linked to disease resistance genes. Analysis of domestication and demographic**  
50 **history revealed active selection for genes involved in drought tolerance in both**  
51 **‘Gilo’ and ‘Shum’ groups. A pan-genome of *S. aethiopicum* was assembled,**  
52 **containing 51,351 protein-coding genes; 7,069 of these genes were missing from**  
53 **the reference genome. The genome sequence of *S. aethiopicum* enhances our**  
54 **understanding of its biotic and abiotic resistance. The single nucleotide**  
55 **polymorphisms identified are immediately available for use by breeders. The**  
56 **information provided here will accelerate selection and breeding of the African**  
57 **eggplant, as well as other crops within the Solanaceae family.**

58

59 **Keywords:** *Solanum aethiopicum*; African eggplant; *Solanum anguivi*; LTR-Rs; biotic  
60 stress; drought tolerance.

61

## 62 **Background**

63 The African eggplant, *Solanum aethiopicum* (NCBI:txid205524), is an indigenous non-  
64 tuberiferous Solanaceae crop that is mainly grown in tropical Africa [1], especially in

65 Central and West Africa. *S. aethiopicum* is hypervariable [2, 3] and is generally  
66 classified into four groups: Gilo, Shum, Kumba and Aculeatum. Gilo is the most  
67 important group and has edible fruits, while Shum has small and bitter fruits. Kumba is  
68 used as a leafy vegetable, while Aculeatum is used as an ornamental [3, 4] or as  
69 rootstock because of its excellent disease resistance [5]. The African eggplant is  
70 reported to have anti-inflammatory activity [6] and its roots and fruits have been used  
71 to treat colic, high blood pressure and uterine complications in Africa [6].

72 Although *S. aethiopicum* is one of the most important cultivated eggplants in Africa [7,  
73 8], it remains an ‘orphan crop’ because research and breeding investments are lagging  
74 behind other Solanaceae relatives, such as *S. lycopersicum* (tomato), *S. tuberosum*  
75 (potato) and *S. melongena* (edible eggplant). Consequently, there have been few robust  
76 genomic resources, such as a well-annotated reference genome. Genomics-assisted  
77 breeding is an effective approach that would facilitate the breeding of orphan crops such  
78 as the African eggplant. Previous attempts to develop molecular markers for *S.*  
79 *aethiopicum*, using the *S. melongena* genome as a reference, have been unsuccessful  
80 because of compromised accuracy [9]. An alternative approach that uses genome  
81 editing has been successfully deployed in other Solanaceae crops, including *Physalis*  
82 *pruinose* [11, 12], but cannot be implemented in *S. aethiopicum* because of its lack of  
83 well-annotated reference genome and gene sequences.

84 The African eggplant serves as a gene reservoir for other economically important crops  
85 within the Solanaceae family. Thanks to its cross-compatibility with *S. melongena* [4,

86 10] and its outstanding resistance to various pathogens, including *Fusarium*, *Ralstonia*  
87 and *Verticillium* [5, 11–13], *S. aethiopicum* has been used to develop rootstocks [13] or  
88 improve the disease resistance of *S. melongena* [14]. As the genomic basis of resistance  
89 in *S. aethiopicum* is poorly understood, it can be time-consuming to use it as a donor in  
90 such interspecific crosses. Mapping resistance genes and then developing markers  
91 associated with these genes might resolve this challenge. The development and  
92 expansion of resistance genes is usually accompanied by the amplification of long  
93 terminal repeat retrotransposons (LTR-Rs). A typical example is shown in the  
94 Solanaceous hot pepper (*Capsicum annuum*), in which a burst of LTR-Rs substantially  
95 mediated the retrotransposition of nucleotide-binding, leucine rich repeat-related (NLR)  
96 genes, leading to the expansion of resistance genes [15]. LTR-Rs are abundant in plant  
97 genomes, including Solanaceae crops such as *Nicotiana sylvestris* (~38.16%) [16],  
98 pepper (more than 70.0%) [17], potato (62.2%) [18], tomato (50.3%) [19] and *Petunia*  
99 (more than 60%) [20]. The role of LTR-Rs in the *S. aethiopicum* genome remains  
100 unknown and whether the resistance seen in *S. aethiopicum* is a result of LTR-R  
101 amplification remains to be investigated. The generation of a reference genome for *S.*  
102 *aethiopicum*, as well as for other orphan crops, is urgently needed to advance their  
103 research and breeding.

104 Here, we report a draft whole genome assembly and annotation for *S. aethiopicum*. We  
105 found two amplifications of LTR-Rs that occurred around 1.25 and 3.5 million years  
106 ago (MYA), resulting in the expansion of resistance genes. We also resequenced two *S.*  
107 *aethiopicum* groups, ‘Gilo’ and ‘Shum’, at a high depth (~60 X) and identified

108 14,995,740 single nucleotide polymorphisms (SNPs), 41,046 of which are closely  
109 linked to resistance genes. Subsequently, we generated a pan-genome of *S. aethopicum*.  
110 The genomic data provided in this study will greatly advance research and breeding  
111 activities of the African eggplant.

112

### 113 **Data Description**

114 We sequenced the genome of *S. aethiopicum* using a whole-genome shotgun (WGS)  
115 approach. A total of 242.61 Gb raw reads were generated by sequencing the libraries  
116 with insert sizes of 250 and 500 bp, and mate-pair libraries with sizes ranging between  
117 2,000 and 20,000 bp, on an Illumina HiSeq 2000 platform. The filtered reads used for  
118 downstream analysis are shown in Supplementary Table 1. *k*-mer ( $k = 17$ ) analysis [21]  
119 revealed the *S. aethiopicum* genome to be diploid and homozygous, with an estimated  
120 genome size of 1.17 Gb (Supplementary Figure 1). ‘Clean reads’ amounting to  
121 127.83 Gb (~ 109 X) were used to assemble the genome using Platanus [22] (see  
122 Methods). A final assembly of 1.02 Gb in size was obtained, containing 162,187  
123 scaffolds with N50 contig and scaffold values of 25.2 Kbp and 516.15 Kbp (Table 1  
124 and Supplementary Table 2), respectively. Our results reveal that the *S. aethiopicum*  
125 genome is larger than that of other *Solanum* genomes, including tomato (0.76 Gb) and  
126 potato (0.73 Gb) [18, 19], but it has a comparable GC ratio (33.12%) (Supplementary  
127 Table 3).

128 Repetitive elements, predominantly transposable elements (TE) (Supplementary Table  
129 4), occupied 790 Mbp (76.2%) of the sequenced genome. Most annotated TEs were

130 retrotransposon elements, including long terminal repeats (LTRs), short interspersed  
131 elements (SINEs) and long interspersed elements (LINEs). Together these  
132 retrotransposons made up 75.42% of the assembly. DNA transposons accounting for  
133 2.87% of the genome were also annotated (Supplementary Table 4).

134 Protein-coding gene models were predicted by a combination of homologous search  
135 and *ab initio* prediction. The resulting models were pooled to generate a final set of  
136 34,906 protein-coding genes. Predicted gene models were, on average, 3,038 bp in  
137 length, with an average of 3.15 introns. The average length of coding sequences, exons  
138 and introns was 1,104 bp, 265 bp and 613 bp, respectively (Table 1, Supplementary  
139 Table 5, Supplementary Figure 2). As expected, these gene features were similar to  
140 those of other released genomes, including *Arabidopsis thaliana* [23] and other  
141 Solanaceae crops including *S. lycopersicum*, *S. tuberosum*, *C. annuum* and *N. sylvestris*  
142 [16, 18, 19, 24] (Supplementary Table 5). We further assessed the annotation  
143 completeness of this assembly by searching for 1,440 core embryophyta genes (CEGs)  
144 with Benchmarking Universal Single-Copy Orthologs (BUSCO, version 3.0) [25]. We  
145 found 80.4% CEGs in this assembly, with 77.8% being single copies and 2.6% being  
146 duplicates (Supplementary Table 6). We also annotated the non-coding genes by  
147 homologous search, leading to the identification of 128 microRNA, 960 tRNA, 1,185  
148 rRNA and 503 snRNA genes (Supplementary Table 7).

149 We annotated 31,863 (91.28%) proteins for their homologous function in several  
150 databases. Homologs of 31,099 (89.09%), 26,319 (75.4%) and 20,932 (59.97%)

151 proteins were found in TrEMBL, InterPro and SwissProt databases, respectively  
152 (Supplementary Table 8). The remaining 3,043 (8.72%) genes encoded putative  
153 proteins with unknown functions.

154

## 155 **Analyses**

### 156 **Genome evolution and phylogenetic analysis**

157 By comparing with four other sequenced Solanaceae genomes (*S. melongena*, *S.*  
158 *lycopersicum*, *S. tuberosum* and *C. annuum*), 25,751 of the *S. aethiopicum* genes were  
159 clustered into 19,310 families using OrthoMCL (version 2.0) [26], with an average of  
160 1.33 genes each. Single-copy genes shared by these five genomes were concatenated as  
161 a super gene representing each genome and were used to build a phylogenetic tree  
162 (Figure 1A). The split time between *S. aethiopicum* and *S. melongena* was estimated to  
163 be ~2.6 MYA. McScanX [27] identified 182 syntenic blocks. We detected evidence of  
164 whole genome duplication (WGD) events in this genome by calculating the pairwise  
165 synonymous mutation rates and the rate of four-fold degenerative third-codon  
166 transversion (4DTV) of 1,686 paralogous genes in these blocks. The 4DTV distribution  
167 plot displayed two peaks, at around 0.25 and 1, indicating two WGDs (Figure 1B). The  
168 first one (peak at 1) represents the ancient WGD event shared by asterids and rosids  
169 [28], while the second WGD event is shared by Solanaceae plants. This suggests that  
170 its occurrence predates the split of Solanaceae.

171

**172 Evolution of gene families**

173 OrthoMCL [26] clustering of genes from *S. aethiopicum*, *S. melongena*, *S. lycopersicum*,  
174 *S. tuberosum* and *C. annuum* identified 25,751 gene families. Among these, 465 gene  
175 families were unique to *S. aethiopicum* and 10,166 were common (Supplementary  
176 Table 9, Figure 1C). As expected, the number of shared gene families decreased as a  
177 function of evolutionary distance between *S. aethiopicum* and the selected species  
178 (Supplementary Table 10). For example, *S. aethiopicum* shared 15,723 gene families  
179 with *S. melongena*, compared with only 13,461 genes shared with *C. annuum*. To  
180 further investigate the evolution of gene families, we identified expanded and  
181 contracted gene families. Compared with *S. melongena*, 437 gene families were  
182 expanded; most expanded gene families were found to be involved in biological  
183 processes related to drought or salinity tolerance or disease resistance, including  
184 defense response (GO:0006952), response to oxidative stress (GO:0006979), glutamate  
185 biosynthetic processes (GO:0006537) and response to metal ions (GO:0010038)  
186 (Supplementary Table 11). No gene families were contracted when comparing with *S.*  
187 *melongena*.

188

**189 Amplification of LTR-Rs**



190 LTR-Rs comprised ~70% of the genome and accounted for 89.31% of the total TEs in  
191 *S. aethiopicum* (Supplementary Table 4). Consistent with previous studies of LTR-Rs,  
192 most LTR-Rs were classified as being in *Ty3/Gypsy* (82.36% of total LTR-Rs) and  
193 *Ty1/Copia* (14.90% of total LTR-Rs) subfamilies. The proportion of *Ty3/Gypsy* in *S.*  
194 *aethiopicum* is comparable to that reported in the hot pepper genome (87.7% of  
195 *Ty3/Gypsy*) [24]. To investigate the roles of LTR-Rs in the evolution of *S. aethiopicum*,  
196 we detected 36,599 full-length LTR-Rs using LTRharvest [29] with the parameters “-  
197 maxlenltr 2000, -similar 75” and LTRdigest software [30]. We further analyzed their  
198 evolution, activity and potential biological functions.

199 The age of each LTR-R was inferred by comparing the divergence between the 5' and  
200 3' LTR-R, using a substitution rate of  $1.3e-8 \text{ year}^{-1}\text{site}^{-1}$  [31]. Two amplifications of  
201 LTR-Rs were found in *S. aethiopicum*, while only one was detected in tomato and hot  
202 pepper (Figure 2A). The early amplification occurred at around 3.5 MYA, coincident  
203 with the LTR-R burst found in *C. annuum* [15] (Figure 2A). The second amplification  
204 was at 1.25 MYA, coinciding with the LTR-R burst in the tomato genome [19] (Figure  
205 2A). Although the time of LTR-Rs amplification is vertically coincident between  
206 different species, they occurred separately in each genome since the ancestor of *S.*  
207 *aethiopicum* diverged from that of hot pepper and tomato about 20 MYA and 4 MYA,  
208 respectively (Figure 1A). These results imply that environmental stimulators shared  
209 between these species during their evolution could have triggered the amplifications  
210 observed. We also estimated the amplification time of *Ty3/Gypsy* and *Ty1/Copia* LTR-  
211 Rs and found two peaks at around 1.25 MYA and 3.5 MYA for Gypsy LTR-Rs (Figure

212 2B), but only one peak (around 1.25 MYA) for *Ty1/Copia* LTR-Rs (Figure 2C).  
213 Compared with the amplification time of *Ty3/Gypsy* and *Ty1/Copia* LTR-Rs in different  
214 species, we observed that the insertion time of *Ty1/Copia* LTR-RTs in *S. aethiopicum*  
215 and tomato were earlier than that of *S. melongena* and hot pepper. On the contrary, the  
216 insertion time of *Ty3/Gypsy* LTR-RTs (around 3.5 MYA) in *S. aethiopicum* was  
217 consistent with the insertion time of hot pepper (Figure 2B, 2C).

218 To investigate the activities of these LTR-Rs, we measured their expression levels by  
219 using RNA-seq data from different tissues (see Methods). Younger LTR-Rs were  
220 expressed in higher levels than those of older LTR-Rs. We detected two peaks of LTR-  
221 R activity, at positions corresponding to the two rounds of LTR-R insertions (Figure  
222 2D–G). The slight shift of the former peaks indicates that the activities degenerated  
223 slower than the LTR-R sequences (Figure 2D–G). The LTR-R activities varied across  
224 these tissues. The degeneration of LTR-R activities was slower in fruits and roots than  
225 those in flowers and leaves (Figure 2D). This pattern was also confirmed by the varied  
226 activity of each LTR-R across these tissues (Figure 2D), implying that these LTR-Rs  
227 have different roles in development.

228

### 229 **Increased resistance is facilitated by LTR-Rs amplification**

230 We identified 1,156 LTR-R captured genes and 491 LTR-R disrupted genes. The  
231 insertion time of LTR-R captured and LTR-R disrupted genes both ranged between 1.5  
232 and 3.5 MYA (Figure 3A), showing a pattern similar to the insertions of whole LTR-Rs

233 (Figure 2A). These results suggest that LTR-R-mediated gene disruption and capture  
234 occurred simultaneously. We further classified the LTR-R captured genes into Gene  
235 Ontology (GO) categories and performed GO enrichment analysis. GO terms related to  
236 disease resistance including ‘defense response to fungus (GO:0006952)’, ‘chitin  
237 catabolic process (GO:0006032)’, ‘chitinase activity (GO:0004568)’, ‘chitin binding  
238 (GO:0008061)’, ‘cell wall macromolecule catabolic process (GO:0016998)’ and  
239 ‘defense response to bacterium (GO:0042742)’ were overrepresented in the LTR-R  
240 captured genes (Figure 3B, Supplementary Table 12), suggesting that they may be  
241 involved in enhancing disease resistance.

242 We also analyzed the expression of genes captured by LTR-Rs. It was intriguing to find  
243 that most of these genes were active in only one tissue (Supplementary Figure 3).  
244 Among these genes, 159 (13.75%), 105 (9.08%), 106 (9.16%) and 129 (11.15%) were  
245 specifically and highly expressed in root, leaf, flower and fruit, respectively. The genes  
246 captured by LTR-Rs that were specifically active in leaf tissues were significantly  
247 enriched in functions relating to disease resistance (Supplementary Table 13). The  
248 biological processes and molecular activities related to disease resistance mentioned  
249 above were overrepresented in these genes (Figure 3C). The high expression level of  
250 resistance genes in leaves would arm the plant with stronger resistance to pathogens.  
251 On the contrary, these GO terms were not enriched in the genes that were specifically  
252 and highly expressed in leaves. Instead, as expected, ‘photosynthesis’ and ‘photosystem  
253 I’ were significantly overrepresented (Supplementary Table 14). The discrepancy

254 between these two gene sets highlights the contribution to resistance of LTR-R captured  
255 genes.

256 Proteins containing nucleotide-binding, leucine-rich repeat domains (NB-LRRs) are  
257 major components that are responsible for defense against various phytopathogens [32].  
258 The NB-LRR family is highly expanded in plants, with numbers ranging from less than  
259 100 to more than 1,000 [33, 34]. As NB-LRR genes are often co-localized with LTR-  
260 Rs [35], we inspected their genomic locations in the *S. aethiopicum* genome. Because  
261 proteins containing the nucleotide-binding (NB) site can also confer disease resistance,  
262 we searched for all the NB-containing genes in the genome. As a result, we identified  
263 447 NB-containing genes in the genome, among which 62 (13.8%) NB-containing  
264 genes co-localized with LTR-Rs were identified as LTR-R captured genes. The  
265 phylogenetic tree shows a substantial expansion of NB-containing genes after the  
266 amplification of LTRs in *S. aethiopicum* (Figure 3D). A similar expansion was also  
267 observed in *S. melongena*. However, the number was significantly fewer than in *S.*  
268 *aethiopicum*, probably because of the limited number of LTR-Rs in the *S. melongena*  
269 genome (Supplementary Table 15).

270

### 271 **Polymorphisms in different *S. aethiopicum* groups**

272 We resequenced 60 *S. aethiopicum* genotypes in two major groups, ‘Gilo’ and ‘Shum’,  
273 and five accessions of *S. anguivi*, the progenitor of *S. aethiopicum* [36]. We generated  
274 ~60 Gb raw data (60 X) (Supplementary Table 20) and identified 18,614,838 SNPs and

275 1,999,241 indels, with an average of 3,530,488 SNPs for each accession  
276 (Supplementary Table 16). On average, there were 18,090 SNPs and 1,943 indels per  
277 megabase. Among them, 426,401 (2.07%), 821,101 (3.98%) and 19,374,353 (93.99%)  
278 were located in exons, introns and intergenic regions, respectively (Table 2). There were  
279 267,710 SNPs that resulted in amino acid sequence changes by introducing new start  
280 codons, premature stop codons, or nonsynonymous substitutions (Table 2). We also  
281 identified 1,999,241 indels and 1,255,302 structural variations (SVs). Of the detected  
282 indels, 178,260 (8.90%) were located in genic regions, among which 2,977 (0.13%)  
283 caused frameshift changes and, therefore, resulted in amino acid sequence changes that  
284 may have led to gene malfunctions. Furthermore, 106,377 SVs were identified in genic  
285 regions, including 53,736 (50.51%) deletions, 34,368 (32.31%) insertions and 8,872  
286 (8.34%) duplications.

287 On counting the SNPs and indels in each group, we found 12,777,811, 15,165,053 and  
288 8,557,818 SNPs in ‘Gilo’, ‘Shum’ and ‘*S. anguivi*’, respectively, accounting for 68.64%,  
289 81.47% and 45.97% of the total SNPs, respectively. There were, 2,019,539 (10.85%),  
290 4,747,418 (25.50%) and 587,885 (3.16%) SNPs unique to ‘Gilo’, ‘Shum’ and ‘*S.*  
291 *anguivi*’, respectively (Figure 4A). Most (93.13%) SNPs in ‘*S. anguivi*’ were shared  
292 with either ‘Gilo’ or ‘Shum’ (Figure 4A), which is in line with the fact that ‘*S. anguivi*’  
293 is the ancestor [36]. Similarly, 92.62% of the indels identified in ‘*S. anguivi*’ were also  
294 shared with ‘Gilo’ or ‘Shum’ (Figure 4B).

295 Nucleotide diversity ( $\pi$ ) of all the genotypes was determined to be  $3.58 \times 10^{-3}$  for whole

296 genomes,  $2.06 \times 10^{-3}$  for genic regions and  $3.75 \times 10^{-3}$  for intergenic regions.  
297 Nucleotide diversity for each genotype revealed lower diversity for ‘Gilo’ (*S. anguivi*:  
298  $3.16 \times 10^{-3}$ , Shum:  $3.65 \times 10^{-3}$  and Gilo:  $2.55 \times 10^{-3}$ , respectively). Linkage  
299 disequilibrium (LD) estimation using Haploview (version 4.2) [37] revealed that  $r^2$   
300 reached the half maximum value at ~150 kb (Figure 4C), which is smaller than in other  
301 Solanaceae crops; for example, tomato (2,000 kb) [38]. Since *S. aethiopicum* has been  
302 routinely used to improve disease resistance in eggplant and other Solanaceae crops  
303 [14], we further identified SNPs that were strongly associated with resistance genes by  
304 selecting those lying within 150 kb of resistance genes. A total of 5,562 SNPs were  
305 finally selected (205 genes), which could be used in the selection of Solanaceae plants  
306 with disease resistance (Supplementary Table 16).

307

### 308 **Population structure and demography of *S. aethiopicum***

309 To investigate the evolution and population demography of *S. aethiopicum*, we first  
310 built a maximum-likelihood (Figure 5A, Supplementary Figure 4) phylogenetic tree  
311 using the full set of SNPs. We observed population structure in the genome-wide  
312 diversity. As anticipated, the accessions from ‘Gilo’ and ‘Shum’ were clearly separated  
313 in the tree, with only one exception in each group, probably caused by labelling errors.  
314 On the other hand, accessions of ‘*S. anguivi*’, the known ancestor of *S. aethiopicum*,  
315 did not cluster separately, but grouped with either ‘Gilo’ or ‘Shum’. This structure was  
316 also supported by principal component analysis (PCA), which clearly separated these

317 accessions into two clusters (Figure 5B, Supplementary Figure 5).

318 The domestication history of *S. aethiopicum* was inferred by constructing a multilevel  
319 population structure using ADMIXTURE [39]. This enabled us to estimate the  
320 maximum likelihood ancestry (Figure 5A). The parameter K, representing the number  
321 of subgroups to be divided, was set from 2–9, and the cross-validation (CV) error was  
322 calculated individually. The CV error converged to 0.4375 when K = 6, suggesting the  
323 division of the resequenced accessions into six subgroups: I–VI (Figure 5A). The  
324 structure changes with increasing K-value from 2 to 6, showing a timelapse  
325 domestication history of *S. aethiopicum* that was first split into two groups, ‘Gilo’ and  
326 ‘Shum’. The former was subsequently divided into subgroups I and II. Two groups  
327 emerged in ‘Shum’ when K = 3, each of which was then divided into two subgroups  
328 when K = 6. In summary, ‘Gilo’ was divided into two subgroups (I and II) and ‘Shum’  
329 was divided into four subgroups (III–VI).

330 The demographic history of *S. aethiopicum* was inferred using the pairwise sequential  
331 Markovian coalescent model (PSMC) [40]. By doing this, we inferred changes in the  
332 effective population sizes of *S. aethiopicum* (Figure 5C). Our data revealed distinct  
333 demographic trends from 10,000 to 100 years ago, in which a bottleneck was shown  
334 around 4,000–5,000 years ago, followed by an immediate expansion of population size.  
335 The great population expansion might be associated with the early domestication of *S.*  
336 *aethiopicum* in Africa, since it coincides with human population growth in western  
337 Africa, also occurring 4,000–5,000 years ago [41].



338

339 **Artificially selected genes in *S. aethiopicum***340 We used *ROD* and *Fst* measures to detect artificially selected regions along the genome.341 Briefly, *ROD* and *Fst* were calculated in a sliding non-overlap 10-kb window. Regions342 with *ROD* > 0.75 and *Fst* > 0.15 were identified as candidate regions under selection.

343 As a result, genomic regions of 3,238 and 1,062 windows were found to be under

344 selection during the domestication of ‘Gilo’ and ‘Shum’, respectively (Supplementary

345 Table 17). Among them, 161 windows were common between these two groups, while

346 3,077 and 901 windows were unique to ‘Gilo’ and ‘Shum’, respectively. Genes located

347 within these regions were identified as selected genes. Thirty-six and 1,406 selected

348 genes were identified in ‘Shum’ and ‘Gilo’, respectively, and 12 of these genes were

349 selected in both. Ten of the 12 genes were annotated in the SwissProt database with

350 known functions and included many genes known to be involved in tolerance to

351 unfavorable environmental stresses, such as autophagy-related gene 18f (*ATG18f*),352 ATP-binding cassette transporter B (*ABCB18*), lysine--tRNA ligase (*LYSRS*), acyl-353 coenzyme A oxidase 4 (*ACX4*), inositol hexakisphosphate and diphosphoinositol-354 pentakisphosphate kinase (*VIP2*) (Supplementary Table 18). For example, *ATG18* is

355 reported to be involved in defense response to powdery mildew fungus through

356 autophagy in *Arabidopsis* [42]; it is also involved in response to nutrition starvation by357 serving as an accessory component to *ATG1/13* kinase complex [43]. *ABCB* is reported

358 to be associated with lipid transport and confers tolerance to heavy metal ions, such as

359 aluminium [44], cadmium and lead [45]. The expression of *LYSRS* has been shown to  
360 be specifically induced in tomato root during the unusual accumulation of metal ions  
361 [46]. *VIP2* is reported to be critical in myo-inositol phosphates (InsPs) signalling  
362 pathways, and is known to be involved in responses to drought and salt stresses [47].  
363 Furthermore, two genes encoding pentatricopeptide repeat-containing protein were also  
364 found among these genes, suggesting that RNA editing may have played a crucial role  
365 in the domestication of *S. aethiopicum* [48]. GO enrichment analysis showed that genes  
366 selected in both the ‘Gilo’ and ‘Shum’ groups were enriched in ‘transport’  
367 (Supplementary Table 19). GO terms for ‘response to auxin’, ‘response to hormone’,  
368 ‘response to salt stress’ and ‘response to water’ were also overrepresented in genes  
369 selected either in ‘Gilo’ or ‘Shum’ only. This result could explain the enhanced  
370 tolerance to drought and salinity in *S. aethiopicum*.

371 We also focused on the diversity of genes co-localized with LTR-Rs. A total of 24,682  
372 SNPs were located within these co-localized genes, corresponding to 0.133% of the  
373 total number of SNPs (18,614,838). This is substantially fewer than would be expected  
374 if SNPs were evenly distributed across all genes, particularly because the LTR-R co-  
375 localized genes comprise 3.31% of the total gene set. The repellant of SNPs in these  
376 genes suggests purifying selection, which was also supported by the large amount  
377 (9,728; 39.41%) of rare SNPs (minor allele frequency <5%) found among the co-  
378 localized genes. We also observed that nonsynonymous SNPs (9,544) were much more  
379 abundant than synonymous ones (5,310) among the co-localized genes. These  
380 variations led to amino acid changes in the encoded proteins, which may have

381 contributed to the diversification of resistance genes.

382

### 383 **Pan- and core-genome of *S. aethiopicum***

384 Gene content varies across different accessions. A single reference assembly is  
385 insufficient to include all *S. aethiopicum* genes. Therefore, we assembled contigs for  
386 individual accessions using pair-end reads, with coverages ranging from 30–60 X  
387 (Supplementary Table 20).

388 We assembled the genomes individually using SOAPdenovo2 [49] and filtered out  
389 contigs smaller than 2 kb. As a result, 753,084 contigs were retained, among which  
390 432,785 were from ‘Shum’, 260,119 were ‘Gilo’ and 60,180 were from ‘*S. anguivi*’.  
391 These contigs were further pooled separately and cleaned by removing duplicates using  
392 CD-HIT [50]. This led to the retention of 97,429, 76,638 and 36,915 contigs for ‘Shum’,  
393 ‘Gilo’ and ‘*S. anguivi*’, respectively. The annotation of these contigs resulted in 41,626,  
394 33,194 and 17,662 protein-coding genes, among which we identified accessory gene  
395 sets of 29,389, 23,726 and 12,829 for ‘Shum’, ‘Gilo’ and ‘*S. anguivi*’, respectively, by  
396 comparing against the reference genome sequence. We generated a pan-genome of *S.*  
397 *aethiopicum* (including ‘Shum’, ‘Gilo’ and ‘*S. anguivi*’ groups) of 51,351 genes  
398 (Supplementary Table 21). These genes were further clustered together with those  
399 annotated in the reference using CD-HIT. Overall, we identified 7,069 genes unique to  
400 the pan-genome gene set, suggesting that they had been missed from the reference. The  
401 average length of accessory genes was 1.62 kb with 2.22 introns. This is comparable to

402 gene models in the reference genome, providing further evidence of accurate annotation.  
403 We further assigned their putative functions by querying against protein databases. A  
404 total of 48,572 (94.59%) genes were fully annotated and functional descriptions  
405 (Supplementary Table 22) provided. Among the identified gene models, 10,409  
406 (20.27%) were common to these three groups and were thus defined as ‘core’ genes. As  
407 expected, they were mainly composed of housekeeping genes (Supplementary Table  
408 23). However, it is important to note that the number of core genes may have been  
409 underestimated because ‘*S. anguivi*’ was under-represented, while the other two *S.*  
410 *aethiopicum* groups, Kumba and Aculeatum, were not included in the current study.

411

## 412 **Discussion**

413 *Solanum aethiopicum* is cross-compatible with *S. melongena* and is routinely used as a  
414 donor of disease resistance genes to its close relative [14]. Genomic analysis of *S.*  
415 *aethiopicum* revealed higher LTR-mediated expansion of resistance gene families than  
416 its other close relatives, including tomato, potato, eggplant and hot pepper. LTR  
417 amplification is one of the major forces driving genome evolution. It shapes the genome  
418 by capturing, interrupting or flanking genes [51]. The consequences of LTR insertions  
419 depend on the genomic position of insertion. For example, inserting into protein-coding  
420 sequences results in pseudogenisation. LTR-Rs adjacent to protein-coding genes can  
421 downregulate or silence the expression of flanking genes by extending methylation  
422 regions or by producing antisense transcripts [52–55]. LTR-Rs also mediate gene

423 retroposition, capturing genes back into the genome [51]. In the current study, LTRs  
424 preferentially captured genes related to disease resistance, resulting in the over-  
425 representation of GO terms related to disease resistance in the LTR-captured genes.  
426 Enrichment of the GO terms ‘chitin binding (GO:0008061)’ and ‘chitinase activity  
427 (GO:0006032)’ (Figure 3B, Supplementary Table 12) implies that these genes may have  
428 been selected to resist infection by fungal pathogens, such as *Fusarium oxysporum* [56].  
429 On the contrary, no GO term enrichment was seen in genes that were disrupted by LTR-  
430 Rs. This suggests that gene disruption by LTR-Rs may be a random event in terms of  
431 gene function. The age distribution of LTR-R captured genes coincidentally fit with that  
432 of the LTR-R disrupted genes, suggesting that these two events may have occurred  
433 simultaneously (Figure 3A). It is not clear why genes related to disease resistance were  
434 favoured by LTR-Rs, but one explanation is that the disease resistance genes may have  
435 been more active than other genes at the time of LTR retrotransposition. The expression  
436 pattern of LTR-R captured genes also varied between tissues. Those related to  
437 resistance were specifically active in the leaf, while those engaged in the transport of  
438 cations, nitrogen and cell proliferation were active in flowers. This outcome suggests  
439 low abundance of transcripts for disease resistance genes, resulting in a relatively low  
440 chance to adequately capture the genes in flowers under normal conditions. Another  
441 possible scenario is that LTR retrotransposition occurred under stress conditions, which  
442 resulted in the simultaneous induction of the expression of resistance genes in gametes  
443 and the activity of LTR retrotransposition. Such possible stresses might be extreme  
444 environmental conditions or pathogen infection. A ‘reinforcement model’ has been

445 proposed to explain the simultaneous accumulation of stress responsive genes and the  
446 activity of retrotransposons in genomes under environmental stress [57, 58].

447 There are four major groups of *S. aethiopicum*: ‘Gilo’, ‘Shum’, ‘Kumba’ and  
448 ‘Aculeatum’. We resequenced accessions from the ‘Gilo’ and ‘Shum’ groups, which are  
449 widely consumed as vegetables. The accessions resequenced in this study were  
450 clustered into six subgroups (two for ‘Shum’ and four for ‘Gilo’). By scanning for  
451 regions with lower genomic diversity, we identified regions and several genes involved  
452 in responses to salt, water and drought tolerance that were under selection during the  
453 domestication of *S. aethiopicum*. Furthermore, purification selection was also found  
454 among disease resistance genes.

455 In the current study, resequencing *S. aethiopicum* and *S. anguivi* genomes at a high  
456 depth (30–60 X) (Supplementary Table 20) enabled us to assemble draft genomes for  
457 these individuals. Despite resequencing only a few genotypes from the two groups, we  
458 intend to supplement the reference gene set with accessory genes by pooling the  
459 resequenced contigs for gene prediction and annotation. This ‘pan-genome’ is expected  
460 to provide a more comprehensive understanding of *S. aethiopicum* in the future.

461 We report a reference genome for African eggplant, which will provide a basic data  
462 resource for further genomic research and breeding activities for *S. aethiopicum*. The  
463 gene sequences annotated in the genome will be essential for developing genome  
464 editing vectors to create mutants to further understand the functions of genes within the  
465 genome and develop superior genotypes. Molecular markers developed using the

466 genome sequences will also enable more efficient and precise selection of superior  
467 accessions by breeders.

468

## 469 **Methods**

### 470 **DNA extraction, library construction and sequencing, and genome assembly**

471 High molecular weight genomic DNA was extracted from young leaves of 14-day old  
472 seedlings of *Solanum aethiopicum* ‘Shum’ accession 303, which had been previously  
473 and repeatedly selfed to ensure homozygosity. Shum 303 is a selection of African  
474 eggplant from Uganda, with green fruits and pigmented stem and leaf veins. DNA was  
475 extracted using a modified CTAB protocol, as previously described [59]. Briefly, 2.5 g  
476 fresh leaf tissue was flash-frozen in liquid nitrogen and ground to a fine powder, before  
477 adding 15 ml of 2x extraction buffer (100 mM Tris-HCl pH 8.0, 1.4 M NaCl, 20 mM  
478 EDTA, 2% w/v CTAB, 10 µl/ml β-mercaptoethanol), then incubated at 65°C. One  
479 volume of chloroform:isoamyl alcohol (24:1) (ChIA) was added and mixed and the  
480 sample was centrifuged twice. The aqueous phase was precipitated overnight and the  
481 washed pellet was treated with RNaseA. A repeat chloroform extraction was performed,  
482 as above, to remove RNaseA and any other contaminants. The aqueous phase was  
483 collected and DNA was precipitated and washed with ethanol. DNA was allowed to dry,  
484 then was resuspended in 100 µl elution buffer.

485 High molecular weight DNA was fragmented and used to construct paired-end libraries



486 with insert sizes of 250 bp, 500 bp, 2 kb, 6 kb, 10 kb and 20 kb, following standard  
487 Illumina protocols. The libraries were sequenced on an Illumina HiSeq 2000 platform,  
488 resulting in a total of 242.61 Gb raw reads. Filtering of duplicated, low quality reads  
489 and reads with adapters was done using SOAPfilter (version 2.2, an application  
490 included in the SOAPdenovo2 package, RRID:SCR\_014986) [49] with the parameters  
491 “-M 2, -f 0, -p”. Reads with  $\geq 40\%$  low quality bases or with  $\geq 10\%$  uncalled bases  
492 (‘N’) were filtered. We used 17 *k*-mer counts [21] of high-quality reads from small  
493 insert libraries to evaluate the genome size and heterozygosity using GCE [60] and  
494 Kmergenie [61]. We assembled the genome using Platanus (Platanus,  
495 RRID:SCR\_015531)[22].

496 Genomic DNA used for resequencing was extracted from young leaves of 65 accessions.  
497 DNA was sheared into small fragments of ~200 bp and used to construct paired-end  
498 libraries, following standard BGI protocols as previously described [62], and  
499 subsequently sequenced on a BGI-500 sequencer. Briefly, the DNA fragments were  
500 ligated to BGISEQ-500 compatible adapters, followed by an index polymerase chain  
501 reaction (PCR) amplification, the products of which were then pooled and circularised  
502 for sequencing on the BGISEQ-500 (BGI, Shenzhen, China). Ultra-deep data were  
503 produced for each accession, with coverage ranging from ~45 to ~75X (Supplementary  
504 Table 20).

505

506 **RNA extraction, library construction and sequencing**

---

507 For RNA extraction, seeds of ‘Gilo’ and ‘Shum’ inbred lines were obtained from  
508 Uganda Christian University. The seeds were planted in a screenhouse at the BecA-  
509 ILRI Hub (Nairobi, Kenya) in polyvinylchloride (PVC) pots (13 cm height and 11.5 cm  
510 diameter) containing sterile forest soil and farmyard manure (2:1). The seedlings were  
511 later transplanted into larger PVC pots of 21 cm height and 14 cm diameter. Plants were  
512 raised in a screenhouse at 21–23°C and 11–13°C day and night temperatures,  
513 respectively (average 12 light hours per day). The plants were regularly watered to  
514 maintain moisture at required capacity.

515 Two plants were selected randomly from each of ‘Gilo’ and ‘Shum’ accessions and were  
516 tagged at the seedling stage for tissue sampling. Fresh tissues were sampled from each  
517 of the tagged plants and flash-frozen in liquid nitrogen immediately. Total RNA was  
518 extracted from the frozen tissues using the ZR Plant RNA Miniprep™ Kit (Zymo  
519 Research, CA, USA), according to the manufacturer’s instructions. RNA integrity was  
520 evaluated by electrophoresis in denaturing agarose gel (1% agarose, 5% formamide, 1X  
521 TAE) stained with 3x Gel Red (Biotium Inc., CA, USA). RNA was quantified using the  
522 Qubit RNA Assay Kit (Life Technologies, Thermo Fisher Scientific Inc.). Ribosomal  
523 RNA (rRNA) was removed from 4 µl of total RNA from each sample using the  
524 Epicentre Ribo-zero™ rRNA Removal Kit (Epicentre, Madison, WI, USA). The rRNA-  
525 depleted RNA was then used to generate strand-specific RNA-seq libraries using  
526 TruSeq® Stranded mRNA Kit (Illumina, San Diego, CA, USA). Twenty mRNA  
527 libraries were prepared, multiplexed (10 samples at a time) and sequenced as paired-  
528 end reads on the MiSeq (Illumina) platform at the BecA-ILRI Hub. Similar to the

529 process of filtering genomic reads, SOAPfilter software [49] was used, with the  
530 parameters “-M 2, -f 0, -p” to filter low quality reads and adapter sequences. Reads with  
531  $\geq 40\%$  low quality bases or with  $\geq 10\%$  uncalled bases (‘N’) were filtered out.

532

### 533 **Repeat annotation**

534 Tandem repeats were searched in the genome using Tandem Repeats Finder (TRF,  
535 version 4.04) [63]. Transposable elements (TEs) were identified by a combination of  
536 homology-based and *de novo* approaches. Briefly, the assembly was aligned to a known  
537 repeats database (Rebase16.02) using RepeatMasker (RRID:SCR\_012954) and  
538 RepeatProteinMask (version 3.2.9) [64] at both the DNA and protein level. In the *de*  
539 *novo* approach, RepeatModeler (version 1.1.0.4, RRID:SCR\_015027) [65] was  
540 employed to build a *de novo* repeat library using the *S. aethiopicum* assembly, in which  
541 redundancies were filtered out. TEs in the genome were then identified by  
542 RepeatMasker [64]. Long terminal repeats (LTR) were identified using LTRharvest [29],  
543 with the criterion of 75% similarity on both sides. LTRdigest [30] was used to identify  
544 the internal elements of LTR-Rs with the eukaryotic tRNA library [66]. Identified LTR-  
545 Rs including intact poly purine tracts and primer binding sites with LTR-Rs on both  
546 sides were considered to be the final intact LTR-Rs. These were then classified into  
547 superfamilies, *Gypsy* and *Copia*, by querying against Rebase 16.02 [67].

548

---

**549 Annotation of gene models and ncRNA**

550 Gene models were predicted using a combination of *de novo* prediction, homology  
551 search and RNA-aided annotation. Augustus software (RRID:SCR\_008417) [68] was  
552 used to perform *de novo* prediction after the annotated repeats were masked in the  
553 assembly. To search for homologous sequences, protein sequences of four closely  
554 related species (*S. lycopersicum*, *S. tuberosum*, *Capsicum annuum* and *Nicotiana*  
555 *glauca*), together with *Arabidopsis thaliana*, were used as query sequences to search  
556 the reference genome sequence using TBLASTN (RRID:SCR\_011822) [69] with the  
557 e-value  $\leq 1e-5$ . Regions mapped by these query sequences were subjected to GeneWise  
558 (RRID:SCR\_015054) [70], together with their flanking sequences (1000 bp) to identify  
559 the positions of start/stop codons and splicing. For RNA-aided annotation, RNA-seq  
560 data from different tissues of *S. aethiopicum* were mapped to the genome assembly of  
561 *S. aethiopicum* using HISAT (RRID:SCR\_015530) [71]. Mapped reads were then  
562 assembled using StringTie (RRID:SCR\_016323) [72]. GLEAN software [73] was used  
563 to integrate mapped transcripts from different sources to produce a consensus gene set.  
564 tRNAscan-SE (RRID:SCR\_010835) [74] was performed to search for reliable tRNA  
565 positions. snRNA and miRNA were detected by searching the reference sequence  
566 against the Rfam database (RRID:SCR\_007891) [75] using BLAST [69]. rRNAs were  
567 detected by aligning with BLASTN (RRID:SCR\_004870) [69] against known plant  
568 rRNA sequences [76]. For functional annotation, protein sequences were searched  
569 against Swissprot, TrEMBL, KEGG (release 88.2), InterPro, Gene Ontology, COG and  
570 Non-redundant protein NCBI databases [77–82].

571

572 **Gene family analysis**

573 Proteins of *S. aethiopicum*, *S. tuberosum* (PGSC v3.4) [18], *S. lycopersicum* (v2.3) [19],  
574 *C. annuum* (PGA v.1.6) [24] and *S. melongena* (Sme2.5.1) [83] were selected to  
575 perform all-against-all comparisons using BLASTP (RRID:SCR\_001010)[69], with an  
576 e-value cutoff of  $\leq 1e-5$ . OrthoMCL (RRID:SCR\_007839) [26] and the default MCL  
577 inflation parameter of 1.5 were used to define the gene families. Single-copy families  
578 were selected to perform multiple sequence alignment using MAFFT  
579 (RRID:SCR\_011811) [84]. Four-fold degenerate sites were picked and used to  
580 construct a phylogenetic tree based on the maximum-likelihood method by PhyML  
581 (RRID:SCR\_014629) [85], with *C. annuum* as the outgroup. WGD analysis was  
582 achieved by identifying colinearity blocks by paralog gene pairs in MCscanX, with  
583 default parameters [27]. Each aligned paralog gene pair was concatenated to a super-  
584 sequence in one colinearity block and 4dTv (transversion of fourfold degenerate site)  
585 values of each block were calculated. We also determined the distribution of 4DTv  
586 values to estimate the speciation between species or WGD events. The divergence time  
587 of *S. aethiopicum* was estimated using the MCMCtree program [86], with the  
588 constructed phylogenetic trees and the divergence time of *C. annuum* [24] and *S.*  
589 *tuberosum* [18].

590

---

**591 Analysis of LTR-Rs**

592 Insertion times of identified, intact LTR-Rs were estimated based on the sequence  
593 divergence between the 5' and 3' LTR of each element. The nucleotide distance K  
594 between one pair of LTR-Rs was calculated using the Kimura 2-parameter method in  
595 Distmat (EMBOSS package) [87]. An average base substitution rate of 1.3e-8 [31] was  
596 used to estimate the insertion time, based on the formula:

$$597 \quad T = K / 2r [15]$$

598 Transcriptomic data were used to analyse the activity of intact LTR-Rs. After filtering  
599 and removing low quality reads, high quality reads from each were mapped against the  
600 full length LTR-R sequence using BWA-MEM software [88], with default parameters.  
601 Expression levels of intact LTR-Rs were calculated using EdgeR [89] and visually  
602 presented using pheatmap in R [90].

603

**604 Analysis of NB-containing genes**

605 Nucleotide-binding (NB) domain-containing genes in the *S. aethiopicum* genome were  
606 identified using a method previously described [15, 91]. Briefly, the HMM profile of  
607 the NB-ARC domain (PF00931) was used as a query to perform an HMMER search  
608 (version 3.2.1, RRID:SCR\_005305 [92]) against protein sequences of tomato, potato,  
609 hot pepper [18, 19, 24] and annotated sequences of *S. aethiopicum*, with an e-value cut-

610 off of  $\leq 1e-60$ . Aligned NB-ARC domain sequences of *S. aethiopicum* were extracted  
611 and used to build the *S. aethiopicum*-specific HMM model. NB-ARC domain  
612 sequences of tomato, potato and hot pepper were mapped as the query sequences  
613 against the *S. aethiopicum* genome using TBLASTN [69], with an e-value cut-off of  
614  $\leq 1e-4$  using GeneWise software [70] to identify candidate NB-containing genes at the  
615 whole genome level. Final NB-containing genes were confirmed by searching the  
616 genome with an *S. aethiopicum*-specific NB-ARC HMM model, constructed with an e-  
617 value cut-off of  $\leq 1e-4$ . Retroduplicated NLRs were identified according to the method  
618 described by Kim et al. (2017) [15]. Phylogenetic trees for *S. aethiopicum* and *S.*  
619 *melongena* NB-containing genes were constructed using FastTree  
620 (RRID:SCR\_015501) [93], with default parameters.

621

## 622 **SNP calling**

623 The Genome Analysis Toolkit (GATK) pipeline (RRID:SCR\_001876) [94] was used  
624 to call SNPs and indels. Briefly, low quality, duplicated and adapter-contaminated reads  
625 were filtered using SOAPfilter (version 2.2) [49] before further processing. To reduce  
626 the compute time, scaffolds in the assembly were sequentially linked into 24 pseudo-  
627 chromosomes, in which the original scaffolds were separated by 100 Ns, before  
628 mapping reads using BWA (RRID:SCR\_010910) [88], with default parameters. Picard-  
629 tools [95] and SAMtools (RRID:SCR\_002105) [96] were used to further process the  
630 alignment outputs, including sorting and marking of duplicates. After alignment and

631 sorting, the GATK pipeline (version 4.0.11.0) was used to call SNPs by sequentially  
632 implementing the following modules: RealignerTargetCreator, IndelRealigner,  
633 UnifiedGenotyper, samtools mpileup, VariantFiltration, BaseRecalibrator,  
634 AnalyzeCovariates, PrintReads and HaplotypeCaller, with default parameters. This  
635 pipeline produced a file in gvcf format, which displayed the called SNPs and indels  
636 filtered according to genotype information. The file was then analysed using PLINK  
637 software [97] for quality control, with “GENO>0.05, MAF<0.1, HWE test p-value  
638  $\leq 0.0001$ ” parameters (GENO: Maximum per-SNP missing; MAF: Minor allele  
639 frequency; HWE: Hardy-Weinberg disequilibrium p-value). The loci of these SNPs and  
640 indels were anchored back to the original scaffolds and annotated using SnpEff [98].  
641 To identify structural variations (SVs), sample information was added using  
642 AddOrReplaceReadGroups, a module of Picard-tools, and SVs were detected using  
643 DiscoverVariantsFromContigAlignmentsSAMSpark, a GATK module.

644

#### 645 **Population analysis**

646 A maximum-likelihood phylogenetic tree was constructed, based on the genotypes at  
647 all the SNP loci using FastTree [93], with default parameters. To perform principal  
648 component analysis (PCA), Beagle4.1 [99] was used to impute the unphased genotypes.  
649 All imputed and identified genotypes at SNP loci were pooled and finalised using  
650 PLINK [97] and ReSeqTools [100], which were then subjected to PCA using GCTA  
651 software [101]. The population was clustered using ADMIXTURE software [39], with



652 K (the expected number of clusters) increasing from 2 to 9. The K value with the  
653 minimum cross-validation error was eventually selected.

654 Genome-wide linkage disequilibrium (LD) was calculated for populations of different  
655 groups using Haploview [102] in windows of 2,000 kb. Briefly, the correlation  
656 coefficient ( $r^2$ ) between SNP pairs in a non-overlapping sliding 1 kb bin was calculated  
657 and then averaged within bins.

658 Candidate regions under selection were identified by comparing polymorphism  
659 levels – measured by *ROD*, as well as by  $F_{ST}$  – between ‘Gilo’, ‘Shum’ and ‘*Solanum*  
660 *anguivi*’ groups. *ROD* was calculated using the formula:

$$661 \quad \text{ROD} = 1 - \pi_{\text{cul}}/\pi_{\text{wild}}$$

662 where  $\pi_{\text{cul}}$  and  $\pi_{\text{wild}}$  denote the nucleotide diversity within the cultivated and wild  
663 populations, respectively.

664  $F_{ST}$  measurement was calculated according to the formula:

$$665 \quad F_{ST} = (\pi_{\text{between}} - \pi_{\text{within}}) / \pi_{\text{between}}$$

666 where  $\pi_{\text{between}}$  and  $\pi_{\text{within}}$  represent the average number of pairwise differences  
667 between two individuals sampled from different or the same population.

## 668 **Construction of pan- and core-genome**

669 To build a gene set including as many *S. aethiopicum* genes as possible, we assembled

---

670 contigs of all 65 resequenced accessions individually using SOAPdenovo2 [49]. The  
671 assembled contigs from each group ('Gilo', 'Shum' and '*S. anguivi*') were then merged.  
672 CD-HIT-EST [50] was used to eliminate redundancy and generate the final dataset of  
673 pan-genomes for each group. Similarly, all these contigs were merged into a pan-  
674 genome of *S. aethiopicum*. Gene models were predicted from these contigs as described  
675 above and their functions were also annotated.

676

#### 677 **Availability of supporting data and materials**

678 The raw sequence data from our genome project was deposited in the NCBI Sequence  
679 Read Archive with BioProject number PRJNA523664 and in the CNGB Nucleotide  
680 Sequence Archive database under project accession number CNP0000317. Assembly  
681 and annotation of the *S. aethiopicum* genome are available in GigaDB [103].  
682 All supplementary figures and tables are provided as Additional Files.

683

#### 684 **Additional files**

685 Supplementary Tables-1.docx

686 Supplementary Tables-2.xlsx

687 Supplementary Figures.docx

688

689 **List of abbreviations**

690 4DTV, four-fold degenerative third-codon transversion; BUSCO, Benchmarking  
691 Universal Single-Copy Orthologs; CEG, core embryophyta gene; CV, cross-validation;  
692 GATK, Genome Analysis Toolkit; LTR, long terminal repeat; LINE, long interspersed  
693 element; LD, Linkage disequilibrium; MYA, million years ago; PSMC, pairwise  
694 sequential Markovian coalescent model; PCA, principal-component analysis; SINE,  
695 short interspersed element; TE, transposable elements; WGD, whole genome  
696 duplication; WGS, whole-genome shotgun.

697

698 **Consent for publication**

699 Not applicable.

700

701 **Competing interests**

702 The authors declare that they have no competing interests.

703

704 **Funding**

705 This work was supported by the National Natural Science Foundation of China (grant  
706 number 31601042), the Science, Technology and Innovation Commission of Shenzhen  
707 Municipality (grant numbers JCYJ20151015162041454 and  
708 JCYJ20160331150739027) and by the Guangdong Provincial Key Laboratory of  
709 Genome Read and Write (grant number 2017B030301011).

710

711 **Authors contributions:**

712 D.A.O., X.X., A.V., X.L., J.W. and H.Y. conceived the project; D.A.O., F.S., E.B.K.,  
713 A.V., S.C. and H.L. managed and supervised the work; B.S. and Y.F. managed the  
714 samples at BGI; B.S. and Y.F. assembled the whole genome, Y.F. and Y.S. annotated the  
715 genome. S.N.K., S.M. and R.K. extracted high molecular weight DNA. H.L. and S.P.  
716 constructed DNA libraries and sequenced the genome. S.N.K. and S.M. prepared RNA  
717 libraries and sequenced the transcriptome. J.N. and S.N.K. assembled and analysed the  
718 transcriptome. Y.S. and B.S. performed the analysis of gene families, LTR evolution and  
719 transcriptomic data; Y.F., B.S., and Y.P.N.K. extracted DNA for re-sequencing samples.  
720 Y.F. and B.S. analysed the resequencing data; Y.S., Y.F. and B.S. collected datasets  
721 required for the genome annotation and analyses. B.S., X.L., Y.S., D.A.O., and Y.F.  
722 wrote and revised the manuscript.

723

724 **Acknowledgements**

725 We acknowledge Uganda Christian University for providing seeds of the African  
726 eggplant.

727

## 728 **References**

- 729 1. Sunseri F, Polignano GB, Alba V, Lotti C, Bisignano V, Mennella G, et al. Genetic diversity and  
730 characterization of African eggplant germplasm collection. *African Journal of Plant Science*.  
731 2010;4:231-41.
- 732 2. Adeniji O, Kusolwa P and Reuben S. Genetic diversity among accessions of *Solanum*  
733 *aethiopicum* L. groups based on morpho-agronomic traits. *Plant Genetic Resources*. 2012;10  
734 3:177-85.
- 735 3. Plazas M, Andújar I, Vilanova S, Gramazio P, Herraiz FJ and Prohens J. Conventional and  
736 phenomics characterization provides insight into the diversity and relationships of hypervariable  
737 scarlet (*Solanum aethiopicum* L.) and gboma (*S. macrocarpon* L.) eggplant complexes.  
738 *Frontiers in plant science*. 2014;5:318.
- 739 4. Prohens J, Plazas M, Raigón MD, Seguí-Simarro JM, Stommel JR and Vilanova S.  
740 Characterization of interspecific hybrids and first backcross generations from crosses between  
741 two cultivated eggplants (*Solanum melongena* and *S. aethiopicum* Kumba group) and  
742 implications for eggplant breeding. *Euphytica*. 2012;186 2:517-38.
- 743 5. Toppino L, Valè G and Rotino GL. Inheritance of *Fusarium* wilt resistance introgressed from  
744 *Solanum aethiopicum* Gilo and *Aculeatum* groups into cultivated eggplant (*S. melongena*) and  
745 development of associated PCR-based markers. *Molecular Breeding*. 2008;22 2:237-50.

- 
- 746 6. FAO. [http://www.fao.org/traditional-crops/africangardeneegg/en/?amp%3Butm\\_medium=soci](http://www.fao.org/traditional-crops/africangardeneegg/en/?amp%3Butm_medium=soci)  
747 [al%20media&amp%3Butm\\_campaign=unfaopinterest](http://www.fao.org/traditional-crops/africangardeneegg/en/?amp%3Butm_medium=social%20media&amp%3Butm_campaign=unfaopinterest). Accessed 19 Aug 2019.
- 748 7. Schippers RR. African indigenous vegetables: an overview of the cultivated species. 2000.
- 749 8. Maundu P, Achigan-Dako E and Morimoto Y. Biodiversity of African vegetables. African  
750 indigenous vegetables in urban agriculture. 2009:65-104.
- 751 9. Gramazio P, Blanca J, Ziarsolo P, Herraiz FJ, Plazas M, Prohens J, et al. Transcriptome analysis  
752 and molecular marker discovery in *Solanum incanum* and *S. aethiopicum*, two close relatives of  
753 the common eggplant (*Solanum melongena*) with interest for breeding. BMC Genomics.  
754 2016;17 1:300.
- 755 10. Mennella G, Rotino GL, Fibiani M, D'Alessandro A, Francese G, Toppino L, et al.  
756 Characterization of health-related compounds in eggplant (*Solanum melongena* L.) lines  
757 derived from introgression of allied species. J Agric Food Chem. 2010;58 13:7597-603.
- 758 11. Cappelli C, Stravato V, Rotino G and Buonauro R. Sources of resistance among *Solanum* spp.  
759 to an Italian isolate of *Fusarium oxysporum* f. sp. *melongenae*. In: *Eucarpia Meeting on genetics*  
760 *and breeding of Capsicum & Eggplant IX* 1995.
- 761 12. Fock I. Source of resistance against *Ralstonia solanacearum* in fertile somatic hybrids of  
762 eggplant (*Solanum melongena* L.) with *Solanum aethiopicum* L. Plant Science An International  
763 Journal of Experimental Plant Biology. 2001;160 2:301-13.
- 764 13. Gisbert C, Prohens J, Raigón MD, Stommel JR and Nuez F. Eggplant relatives as sources of  
765 variation for developing new rootstocks: Effects of grafting on eggplant yield and fruit apparent  
766 quality and composition. Scientia Horticulturae. 2011;128 1:14-22.
- 767 14. Rizza F, Mennella G, Collonnier C, Sihachakr D, Kashyap V, Rajam M, et al. Androgenic

- 768 dihaploids from somatic hybrids between *Solanum melongena* and *S. aethiopicum* group gilo  
769 as a source of resistance to *Fusarium oxysporum f. sp. melongenae*. *Plant Cell Reports*. 2002;20  
770 11:1022-32.
- 771 15. Kim S, Park J, Yeom SI, Kim YM, Seo E, Kim KT, et al. New reference genome sequences of  
772 hot pepper reveal the massive evolution of plant disease-resistance genes by retroduplication.  
773 *Genome Biology*. 2017;18 1:210.
- 774 16. Siéro N, Battey JN, Ouadi S, Bovet L, Goepfert S, Bakaher N, et al. Reference genomes and  
775 transcriptomes of *Nicotiana sylvestris* and *Nicotiana tomentosiformis*. *Genome Biology*.  
776 2013;14 6:R60.
- 777 17. Qin C, Yu C, Shen Y, Fang X, Chen L, Min J, et al. Whole-genome sequencing of cultivated  
778 and wild peppers provides insights into *Capsicum* domestication and specialization. *Proc Natl*  
779 *Acad Sci U S A*. 2014;111 14:5135-40.
- 780 18. Consortium TPGS. Genome sequence and analysis of the tuber crop potato. *Nature*. 2011;475  
781 7355:189-95.
- 782 19. Consortium TG. The tomato genome sequence provides insights into fleshy fruit evolution.  
783 *Nature*. 2012;485 7400:635.
- 784 20. Bombarely A, Moser M, Amrad A, Bao M, Bapaume L, Barry CS, et al. Insight into the  
785 evolution of the Solanaceae from the parental genomes of *Petunia hybrida*. *Nat Plants*. 2016;2  
786 6:16074.
- 787 21. Moscone EA, Baranyi M, Ebert I, Greilhuber J, Ehrendorfer F and Hunziker AT. Analysis of  
788 Nuclear DNA Content in *Capsicum* (Solanaceae) by Flow Cytometry and Feulgen Densitometry.  
789 *Annals of Botany*. 2003;92 1:21.

- 
- 790 22. Kajitani R, Toshimoto K, Noguchi H, Toyoda A, Ogura Y, Okuno M, et al. Efficient de novo  
791 assembly of highly heterozygous genomes from whole-genome shotgun short reads. *Genome*  
792 *Research*. 2014;24 8:1384-95.
- 793 23. Initiative AG. Analysis of the genome sequence of the flowering plant *Arabidopsis thaliana*.  
794 *Nature*. 2000;408 6814:796-815.
- 795 24. Kim S, Park M, Yeom SI, Kim YM, Lee JM, Lee HA, et al. Genome sequence of the hot pepper  
796 provides insights into the evolution of pungency in *Capsicum* species. *Nature Genetics*. 2014;46  
797 3:270-8.
- 798 25. Waterhouse RM, Seppey M, Simão FA, Manni M, Ioannidis P, Klioutchnikov G, et al. BUSCO  
799 applications from quality assessments to gene prediction and phylogenomics. *Molecular*  
800 *Biology & Evolution*. 2017;35 3.
- 801 26. Li L, Stoeckert CJ and Roos DS. OrthoMCL: identification of ortholog groups for eukaryotic  
802 genomes. *Genome Research*. 2003;13 9:2178-89.
- 803 27. Wang Y, Tang H, DeBarry JD, Tan X, Li J, Wang X, et al. MCScanX: a toolkit for detection and  
804 evolutionary analysis of gene synteny and collinearity. *Nucleic acids research*. 2012;40 7:e49-  
805 e.
- 806 28. Jaillon O, Aury J-M, Noel B, Policriti A, Clepet C, Casagrande A, et al. The grapevine genome  
807 sequence suggests ancestral hexaploidization in major angiosperm phyla. *Nature*. 2007;449  
808 7161:463.
- 809 29. Ellinghaus D, Kurtz S and Willhoeft U. LTRharvest, an efficient and flexible software for de  
810 novo detection of LTR retrotransposons. *BMC bioinformatics*. 2008;9 1:18.
- 811 30. Steinbiss S, Willhoeft U, Gremme G and Kurtz S. Fine-grained annotation and classification of



- 
- 812 de novo predicted LTR retrotransposons. *Nucleic acids research*. 2009;37 21:7002-13.
- 813 31. Ma J and Bennetzen JL. Rapid recent growth and divergence of rice nuclear genomes.  
814 *Proceedings of the National Academy of Sciences*. 2004;101 34:12404-10.
- 815 32. McHale L, Tan X, Koehl P and Michelmore RW. Plant NBS-LRR proteins: adaptable guards.  
816 *Genome Biology*. 2006;7 4:212.
- 817 33. Yue JX, Meyers BC, Chen JQ, Tian D and Yang S. Tracing the origin and evolutionary history  
818 of plant nucleotide-binding site-leucine-rich repeat (NBS-LRR) genes. *New Phytologist*.  
819 2012;193 4:1049-63.
- 820 34. Xia R, Xu J, Arikiti S and Meyers BC. Extensive Families of miRNAs and PHAS Loci in  
821 Norway Spruce Demonstrate the Origins of Complex phasiRNA Networks in Seed Plants.  
822 *Molecular Biology & Evolution*. 2015;32 11:2905-18.
- 823 35. Ratnaparkhe MB, Wang X, Li J, Compton RO, Rainville LK, Lemke C, et al. Comparative  
824 analysis of peanut NBS-LRR gene clusters suggests evolutionary innovation among duplicated  
825 domains and erosion of gene microsynteny. *New Phytologist*. 2011;192 1:164-78.
- 826 36. Lester R and Niakan L. Origin and domestication of the scarlet eggplant, *Solanum aethiopicum*,  
827 from *S. anguivi* in Africa. *Solanaceae: Biology and systematics*. 1986:433-56.
- 828 37. Barrett JC, Fry B, Maller J and Daly MJ. Haploview: analysis and visualization of LD and  
829 haplotype maps. *Bioinformatics*. 2004;21 2:263-5.
- 830 38. Pascual L, Desplat N, Huang BE, Desgroux A, Bruguier L, Bouchet JP, et al. Potential of a  
831 tomato MAGIC population to decipher the genetic control of quantitative traits and detect causal  
832 variants in the resequencing era. *Plant Biotechnology Journal*. 2015;13 4:565-77.
- 833 39. Alexander DH, Novembre J and Lange K. Fast model-based estimation of ancestry in unrelated

- 834 individuals. *Genome research*. 2009.
- 835 40. Li H and Richard D. Inference of Human Population History From Whole Genome Sequence  
836 of A Single Individual. *Nature*. 2012;475 7357:493-6.
- 837 41. Manning K and Timpson A. The demographic response to Holocene climate change in the  
838 Sahara. *Quaternary Science Reviews*. 2014;101:28-35.
- 839 42. Wang Y, Wu Y and Tang D. The autophagy gene, ATG18a, plays a negative role in powdery  
840 mildew resistance and mildew-induced cell death in *Arabidopsis*. *Plant signaling & behavior*.  
841 2011;6 9:1408-10.
- 842 43. Suttangkakul A, Li F, Chung T and Vierstra RD. The ATG1/ATG13 protein kinase complex is  
843 both a regulator and a target of autophagic recycling in *Arabidopsis*. *The Plant Cell*. 2011;23  
844 10:3761-79.
- 845 44. Larsen PB, Cancel J, Rounds M and Ochoa V. *Arabidopsis* ALS1 encodes a root tip and stele  
846 localized half type ABC transporter required for root growth in an aluminum toxic environment.  
847 *Planta*. 2007;225 6:1447.
- 848 45. Kim D-Y, Bovet L, Kushnir S, Noh EW, Martinoia E and Lee Y. AtATM3 is involved in heavy  
849 metal resistance in *Arabidopsis*. *Plant physiology*. 2006;140 3:922-32.
- 850 46. Giritch A, Herbik A, Balzer HJ, Ganai M, Stephan UW and Bäumlein H. A root-specific iron-  
851 regulated gene of tomato encodes a lysyl-tRNA-synthetase-like protein. *European journal of*  
852 *biochemistry*. 1997;244 2:310-7.
- 853 47. Perera IY, Hung C-Y, Moore CD, Stevenson-Paulik J and Boss WF. Transgenic *Arabidopsis*  
854 plants expressing the type 1 inositol 5-phosphatase exhibit increased drought tolerance and  
855 altered abscisic acid signaling. *The Plant Cell*. 2008;20 10:2876-93.

- 
- 856 48. Cheng S, Gutmann B, Zhong X, Ye Y, Fisher MF, Bai F, et al. Redefining the structural motifs  
857 that determine RNA binding and RNA editing by pentatricopeptide repeat proteins in land plants.  
858 The Plant Journal. 2016;85 4:532-47.
- 859 49. Luo R, Liu B, Xie Y, Li Z, Huang W, Yuan J, et al. SOAPdenovo2: an empirically improved  
860 memory-efficient short-read de novo assembler. GigaScience. 2012;1 1:18.
- 861 50. Fu L, Niu B, Zhu Z, Wu S and Li W. CD-HIT: accelerated for clustering the next-generation  
862 sequencing data. Bioinformatics. 2012;28 23:3150-2.
- 863 51. Galindo-González L, Mhiri C, Deyholos MK and Grandbastien M-A. LTR-retrotransposons in  
864 plants: engines of evolution. Gene. 2017;626:14-25.
- 865 52. Kashkush K, Feldman M and Levy AA. Transcriptional activation of retrotransposons alters the  
866 expression of adjacent genes in wheat. Nature genetics. 2003;33 1:102.
- 867 53. Kashkush K and Khasdan V. Large-scale survey of cytosine methylation of retrotransposons  
868 and the impact of readout transcription from long terminal repeats on expression of adjacent  
869 rice genes. Genetics. 2007;177 4:1975-85.
- 870 54. Hollister JD, Smith LM, Guo Y-L, Ott F, Weigel D and Gaut BS. Transposable elements and  
871 small RNAs contribute to gene expression divergence between *Arabidopsis thaliana* and  
872 *Arabidopsis lyrata*. Proceedings of the National Academy of Sciences. 2011:201018222.
- 873 55. Hollister JD and Gaut BS. Epigenetic silencing of transposable elements: a trade-off between  
874 reduced transposition and deleterious effects on neighboring gene expression. Genome research.  
875 2009.
- 876 56. Ma L-J, Van Der Does HC, Borkovich KA, Coleman JJ, Daboussi M-J, Di Pietro A, et al.  
877 Comparative genomics reveals mobile pathogenicity chromosomes in *Fusarium*. Nature.

- 878 2010;464 7287:367.
- 879 57. Song B, Morse D, Song Y, Fu Y, Lin X, Wang W, et al. Comparative genomics reveals two  
880 major bouts of gene retroposition coinciding with crucial periods of Symbiodinium evolution.  
881 Genome Biology and Evolution. 2017;9 8:2037-47.
- 882 58. Song B, Chen S and Chen W. Dinoflagellates, a unique lineage for retrogene research. Frontiers  
883 in microbiology. 2018;9:1556.
- 884 59. Stoffel K, van Leeuwen H, Kozik A, Caldwell D, Ashrafi H, Cui X, et al. Development and  
885 application of a 6.5 million feature Affymetrix Genechip® for massively parallel discovery of  
886 single position polymorphisms in lettuce (*Lactuca spp.*). BMC Genomics. 2012;13 1:185.
- 887 60. Liu B, Shi Y, Yuan J, Hu X, Zhang H, Li N, et al. Estimation of genomic characteristics by  
888 analyzing k-mer frequency in de novo genome projects. arXiv preprint arXiv:13082012. 2013.
- 889 61. Chikhi R and Medvedev P. Informed and automated k-mer size selection for genome assembly.  
890 Bioinformatics. 2013;30 1:31-7.
- 891 62. Jie Huang, Xinming Liang, Yuankai Xuan, Chunyu Geng, Yuxiang Li, Haorong Lu, Shoufang  
892 Qu, Xianglin Mei, Hongbo Chen, Ting Yu, Nan Sun, Junhua Rao, Jiahao Wang, Wenwei Zhang,  
893 Ying Chen, Sha Liao, Hui Jiang, Xin Liu, Zhaopeng Yang, Feng Mu, Shangxian Gao (2018).  
894 BGISEQ-500 WGS library construction. protocols.io  
895 <http://dx.doi.org/10.17504/protocols.io.ps5dng6>
- 896 63. Benson G. Tandem repeats finder: a program to analyze DNA sequences. Nucleic acids research.  
897 1999;27 2:573-80.
- 898 64. Smit A, Hubley R and Green P. RepeatMasker Open-4.0. 2013–2015. 2015.
- 899 65. Smit AF and Hubley R. RepeatModeler Open-1.0. Available fom [http://www repeatmasker org](http://www.repeatmasker.org).

- 
- 900 2008.
- 901 66. GtRNADB. <http://gtRNADB.ucsc.edu/>. Accessed 19 Aug 2019.
- 902 67. Bao W, Kojima KK and Kohany O. Repbase Update, a database of repetitive elements in  
903 eukaryotic genomes. *Mobile DNA*. 2015;6 1:11.
- 904 68. Stanke M, Keller O, Gunduz I, Hayes A, Waack S and Morgenstern B. AUGUSTUS: ab initio  
905 prediction of alternative transcripts. *Nucleic acids research*. 2006;34 suppl\_2:W435-W9.
- 906 69. Altschul SF, Gish W, Miller W, Myers EW and Lipman DJ. Basic local alignment search tool.  
907 *Journal of molecular biology*. 1990;215 3:403-10.
- 908 70. Birney E, Clamp M and Durbin R. GeneWise and genomewise. *Genome research*. 2004;14  
909 5:988-95.
- 910 71. Kim D, Langmead B and Salzberg SL. HISAT: a fast spliced aligner with low memory  
911 requirements. *Nature methods*. 2015;12 4:357.
- 912 72. Perteua M, Perteua GM, Antonescu CM, Chang T-C, Mendell JT and Salzberg SL. StringTie  
913 enables improved reconstruction of a transcriptome from RNA-seq reads. *Nature biotechnology*.  
914 2015;33 3:290.
- 915 73. Elsik CG, Mackey AJ, Reese JT, Milshina NV, Roos DS and Weinstock GM. Creating a honey  
916 bee consensus gene set. *Genome biology*. 2007;8 1:R13.
- 917 74. Lowe TM and Eddy SR. tRNAscan-SE: a program for improved detection of transfer RNA  
918 genes in genomic sequence. *Nucleic acids research*. 1997;25 5:955.
- 919 75. Kalvari I, Argasinska J, Quinones-Olvera N, Nawrocki EP, Rivas E, Eddy SR, et al. Rfam 13.0:  
920 shifting to a genome-centric resource for non-coding RNA families. *Nucleic acids research*.  
921 2017;46 D1:D335-D42.

- 922 76. Vitales D, D'Ambrosio U, Gálvez F, Kovařík A, Garcia S. Third release of the plant rDNA  
923 database with updated content and information on telomere composition and sequenced plant  
924 genomes. *Plant Systematics and Evolution*. 2017;303:1115-1121.
- 925 77. Consortium U. UniProt: the universal protein knowledgebase. *Nucleic acids research*. 2018;46  
926 5:2699.
- 927 78. Mitchell AL, Attwood TK, Babbitt PC, Blum M, Bork P, Bridge A, et al. InterPro in 2019:  
928 improving coverage, classification and access to protein sequence annotations. *Nucleic Acids  
929 Research*. 2018.
- 930 79. Ashburner M, Ball CA, Blake JA, Botstein D, Butler H, Cherry JM, et al. Gene Ontology: tool  
931 for the unification of biology. *Nature genetics*. 2000;25 1:25.
- 932 80. Consortium GO. Expansion of the Gene Ontology knowledgebase and resources. *Nucleic acids  
933 research*. 2016;45 D1:D331-D8.
- 934 81. Tatusov RL, Fedorova ND, Jackson JD, Jacobs AR, Kiryutin B, Koonin EV, et al. The COG  
935 database: an updated version includes eukaryotes. *BMC bioinformatics*. 2003;4 1:41.
- 936 82. Bairoch A and Apweiler R. The SWISS-PROT protein sequence database and its supplement  
937 TrEMBL in 2000. *Nucleic acids research*. 2000;28 1:45-8.
- 938 83. Hirakawa H, Shirasawa K, Miyatake K, Nunome T, Negoro S, Ohyama A, et al. Draft genome  
939 sequence of eggplant (*Solanum melongena* L.): the representative solanum species indigenous  
940 to the old world. *DNA research*. 2014;21 6:649-60.
- 941 84. Nakamura T, Yamada KD, Tomii K, Katoh K and Hancock J. Parallelization of MAFFT for  
942 large-scale multiple sequence alignments. *Bioinformatics*. 2018;1:3.
- 943 85. Guindon S, Dufayard J-F, Lefort V, Anisimova M, Hordijk W and Gascuel O. New algorithms

- 944 and methods to estimate maximum-likelihood phylogenies: assessing the performance of  
945 PhyML 3.0. *Systematic biology*. 2010;59 3:307-21.
- 946 86. Yang Z and Rannala B. Bayesian estimation of species divergence times under a molecular  
947 clock using multiple fossil calibrations with soft bounds. *Molecular biology and evolution*.  
948 2005;23 1:212-26.
- 949 87. Rice P, Longden I and Bleasby A. EMBOSS: the European molecular biology open software  
950 suite. *Trends in genetics*. 2000;16 6:276-7.
- 951 88. Li H and Durbin R. Fast and accurate short read alignment with Burrows–Wheeler transform.  
952 *bioinformatics*. 2009;25 14:1754-60.
- 953 89. Robinson MD, McCarthy DJ and Smyth GK. edgeR: a Bioconductor package for differential  
954 expression analysis of digital gene expression data. *Bioinformatics*. 2010;26 1:139-40.
- 955 90. Kolde R and Kolde MR. Package ‘pheatmap’. 2018.
- 956 91. Seo E, Kim S, Yeom S-I and Choi D. Genome-wide comparative analyses reveal the dynamic  
957 evolution of nucleotide-binding leucine-rich repeat gene family among Solanaceae plants.  
958 *Frontiers in plant science*. 2016;7:1205.
- 959 92. HMMER. <http://hmmer.org/>. Accessed 19 Aug 2019.
- 960 93. Price MN, Dehal PS and Arkin AP. FastTree 2—approximately maximum-likelihood trees for  
961 large alignments. *PloS one*. 2010;5 3:e9490.
- 962 94. GATK. <https://software.broadinstitute.org/gatk/>. Accessed 19 Aug 2019.
- 963 95. Picard. <https://broadinstitute.github.io/picard/>. Accessed 19 Aug 2019.
- 964 96. Li H, Handsaker B, Wysoker A, Fennell T, Ruan J, Homer N, et al. The sequence alignment/map  
965 format and SAMtools. *Bioinformatics*. 2009;25 16:2078-9.

- 966 97. Chang CC, Chow CC, Tellier LC, Vattikuti S, Purcell SM and Lee JJ. Second-generation PLINK:  
967 rising to the challenge of larger and richer datasets. *GigaScience*. 2015;4 1:7.
- 968 98. Cingolani P, Platts A, Wang LL, Coon M, Nguyen T, Wang L, et al. A program for annotating  
969 and predicting the effects of single nucleotide polymorphisms, SnpEff: SNPs in the genome of  
970 *Drosophila melanogaster* strain w1118; iso-2; iso-3. *Fly*. 2012;6 2:80-92.
- 971 99. Browning SR and Browning BL. Rapid and accurate haplotype phasing and missing-data  
972 inference for whole-genome association studies by use of localized haplotype clustering. *The*  
973 *American Journal of Human Genetics*. 2007;81 5:1084-97.
- 974 100. He W, Zhao S, Liu X, Dong S, Lv J, Liu D, et al. ReSeqTools: an integrated toolkit for large-  
975 scale next-generation sequencing based resequencing analysis. *Genetics and Molecular*  
976 *Research*. 2013;12 4:6275-83.
- 977 101. Yang J, Lee SH, Goddard ME and Visscher PM. Genome-wide complex trait analysis (GCTA):  
978 methods, data analyses, and interpretations. *Genome-wide association studies and genomic*  
979 *prediction*. Springer; 2013. p. 215-36.
- 980 102. Barrett JC, Fry B, Maller J, Daly MJ. Haploview: analysis and visualization of LD and  
981 haplotype maps. *Bioinformatics*. 2005;21:263-265.
- 982 103. Song B; Song Y; Fu Y; Kizito EB; Kamenya SN; Kabod PN; Liu H; Muthemba S; Kariba R;  
983 Njuguna J; Maina S; Stomeo F; Djikeng A; Hendre PS; Chen X; Chen W; Li X; Sun W; Wang  
984 S; Cheng S; Muchugi A; Jamnadass R; Shapiro H; Van Deynze A; Yang H; Wang J; Xu X;  
985 Odeny DA; Liu X (2019): Supporting data for "Draft genome sequence of *Solanum aethiopicum*  
986 provides insights into disease resistance, drought tolerance and the evolution of the genome".  
987 *GigaScience Database*. <http://dx.doi.org/10.5524/100642>



988

989 **Tables**990 Table 1: Statistical data for the *Solanum aethiopicum* genome and gene annotation

|                                       |                   |
|---------------------------------------|-------------------|
| Number of scaffolds                   | 162,187           |
| Total length of scaffolds             | 1.02 Gb           |
| N50 of scaffolds                      | 516.1 Kb          |
| Longest scaffolds                     | 2.94 Mp           |
| Number of contigs                     | 231,821           |
| Total length of contigs               | 936 Mb            |
| N50 of contigs                        | 25.2 Kb           |
| Longest contigs                       | 366.2 kb          |
| GC content                            | 33.13%            |
| Number of genes                       | 34,906            |
| Average/total coding sequence length  | 1104.3bp/38.5 Mb  |
| Average exon/intron length            | 265.8bp/613.1 bp  |
| Total length of transposable elements | 805.7 Mb (78.23%) |

991

992 **Table 2:** Statistical data for single nucleotide polymorphisms and indels of 65

993 accessions

| Type | Class  | Number  | Percentage (%) |
|------|--------|---------|----------------|
| SNPs | Exon   | 393,882 | 2.12           |
|      | Intron | 675,360 | 3.63           |

|        |               |                   |       |
|--------|---------------|-------------------|-------|
|        | Intergenic    | 17,552,823        | 94.29 |
|        | Synonymous    | 126,172           | 0.67  |
|        | Nonsynonymous | 267,710           | 1.44  |
|        | <b>Total</b>  | <b>18,614,838</b> |       |
| Indels | Exon          | 32,519            | 1.62  |
|        | Intron        | 145,741           | 7.28  |
|        | Intergenic    | 1,821,530         | 91.11 |
|        | Frame shift   | 2,977             | 0.13  |
|        | <b>Total</b>  | <b>1,999,241</b>  |       |

994

995 **Figure legends**996 **Figure 1:** Comparative analysis of the *Solanum aethiopicum* genome.

997 (A) Phylogenetic analysis of *Solanum melongena*, *S. lycopersicum*, *S. tuberosum*, *S.*  
998 *aethiopicum* and *Capsicum annuum* using single-copy gene families. The species  
999 differentiation time between *S. aethiopicum* and *S. melongena* was 2.6 million years.  
1000 (B) Distribution of 4DTv distance, which showed two peaks around 0.25 and 1 (black  
1001 line), representing two whole genome duplication events. (C) Venn diagram showing  
1002 overlaps of gene families between *S. melongena*, *S. lycopersicum*, *S. tuberosum*, *S.*  
1003 *aethiopicum* and *C. annuum*. A total of 465 gene families were unique to *S. aethiopicum*  
1004 and 10,166 were common to the genomes of the five species.

1005

1006 **Figure 2:** Long terminal repeat retrotransposon (LTR-R) insertion time distribution and

1007 the expression level of LTR-Rs in different tissues.  
1008 Insertion time distribution of total LTR-Rs (**A**), *Ty3/Gypsy* LTR-Rs (**B**) and *Ty1/Copia*  
1009 LTR-Rs (**C**) of *Capsicum annuum*, *Solanum melongena*, *S. lycopersicum* and *S.*  
1010 *aethiopicum*. The x- and y-axes, respectively, indicate the insertion time and the  
1011 frequency of inserted LTR-Rs. Expression levels of LTR-Rs in flower (**D**), fruit (**E**),  
1012 leaf (**F**) and root (**G**) tissues.

1013

1014 **Figure 3:** LTR-R captured and disrupted genes.

1015 (**A**) The distribution of ages of LTR-R captured and disrupted genes. (**B**) GO  
1016 enrichment analysis between the LTR-R captured and disrupted gene set. (**C**) GO terms  
1017 enriched in LTR-R captured genes that are specifically and highly expressed in various  
1018 tissues, including leaf, flower, root and fruit. (**D**) Phylogenetic tree of the nucleotide-  
1019 binding, leucine rich repeat-related (NLR) gene in *Solanum aethiopicum* and *S.*  
1020 *melongena*.

1021

1022 **Figure 4:** Single nucleotide polymorphisms (SNPs), indel and linkage disequilibrium  
1023 (LD) decay for ‘Gilo’, ‘Shum’ and ‘*S. anguivi*’ groups.

1024 (**A**) SNPs numbering 2,019,539 (10.85%), 4,747,418 (25.50%) and 587,885 (3.16%)  
1025 were unique to ‘Gilo’, ‘Shum’ and ‘*S. anguivi*’, respectively. Most (93.13%) of SNPs  
1026 in ‘*S. anguivi*’ were shared with either ‘Gilo’ or ‘Shum’. (**B**) Indels amounting to  
1027 14.06%, 28.96% and 2.76% were unique to ‘Gilo’, ‘Shum’ and ‘*S. anguivi*’,  
1028 respectively and, like the SNP statistics in these groups, 92.62% of indels in ‘*S. anguivi*’

1029 were shared with either ‘Gilo’ or ‘Shum’. (C) LD estimation revealed that  $r^2$  reaches  
1030 the half maximum value at ~150 kb.

1031

1032 **Figure 5:** Population structure and demography of *Solanum aethiopicum*.

1033 (A) A maximum-likelihood phylogenetic tree and population structure constructed  
1034 using the full set of single nucleotide polymorphisms (SNPs). (B) Principal component  
1035 analysis (PCA). (C) Pairwise sequential Markovian coalescent (PSMC) model analysis  
1036 indicated a distinct demographic history of *S. aethiopicum* from 10,000 to 100 years  
1037 ago, in which a bottleneck was shown around 4,000–5,000 years ago, followed by an  
1038 immediate expansion of population size.

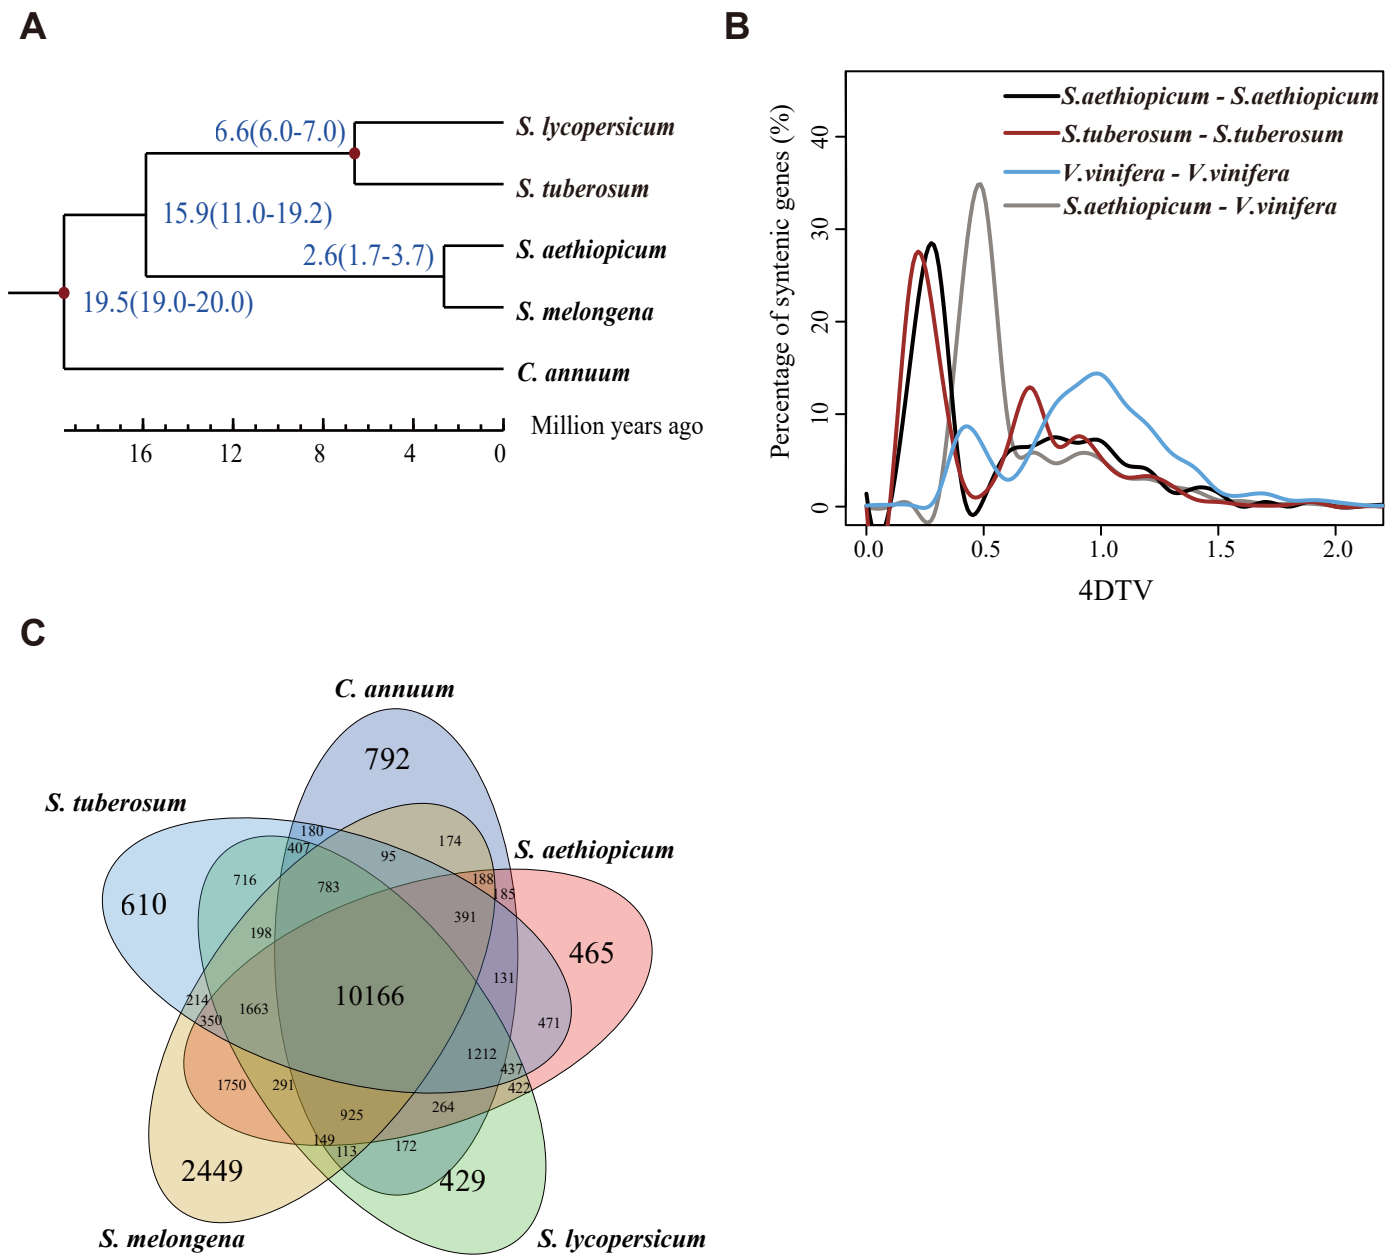

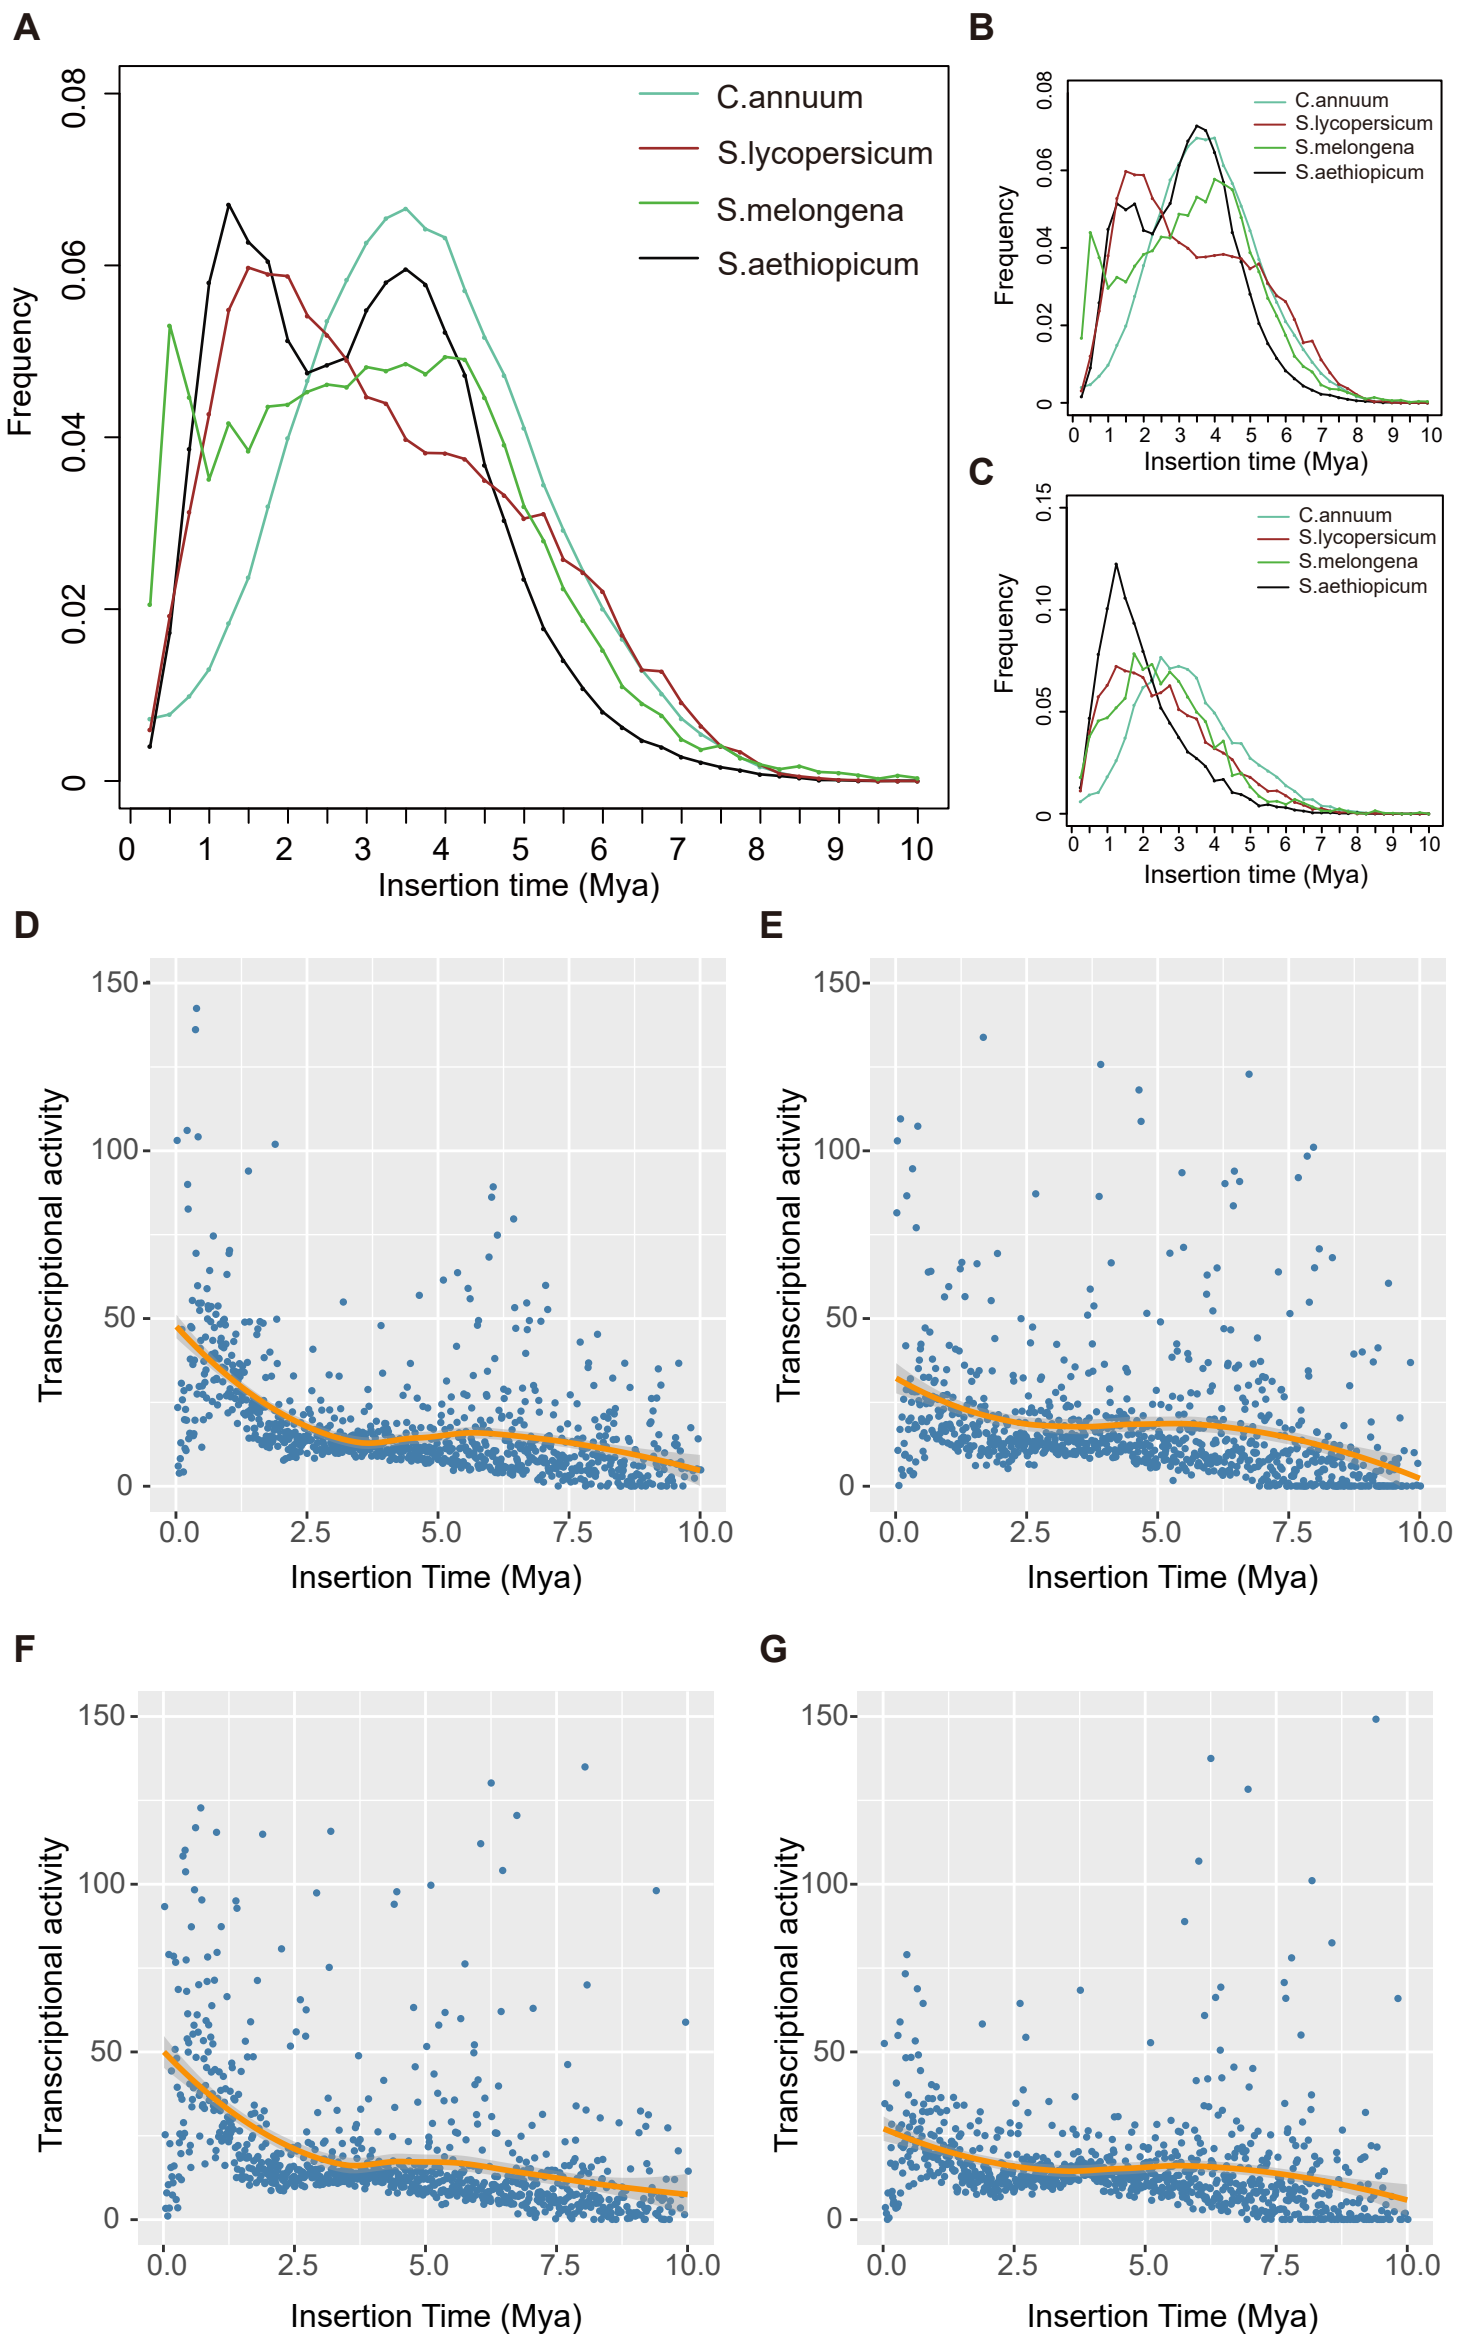

**A**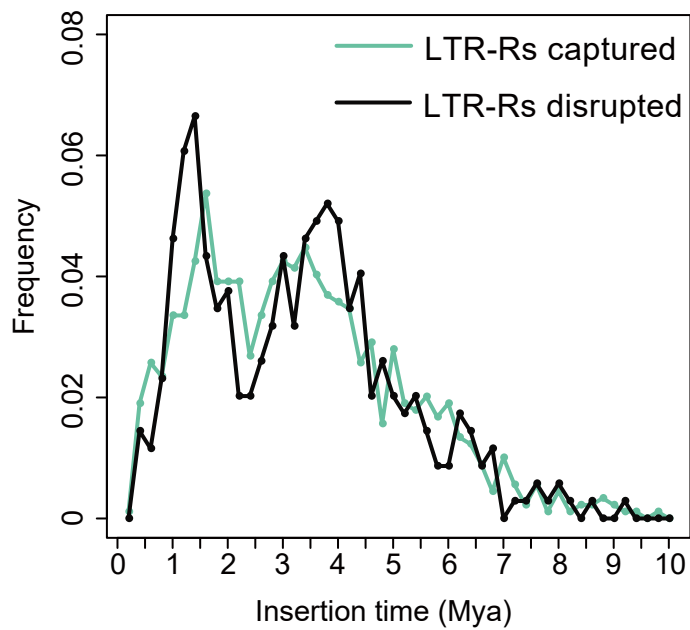**B**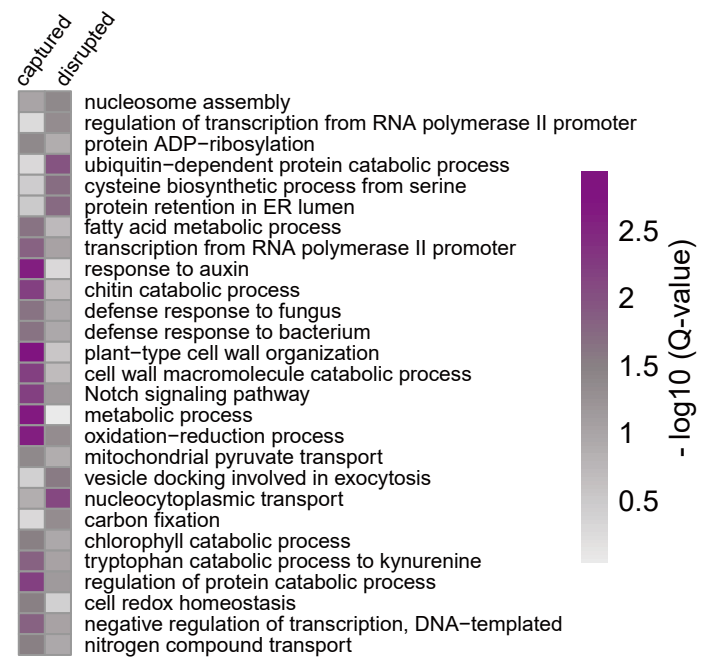**C**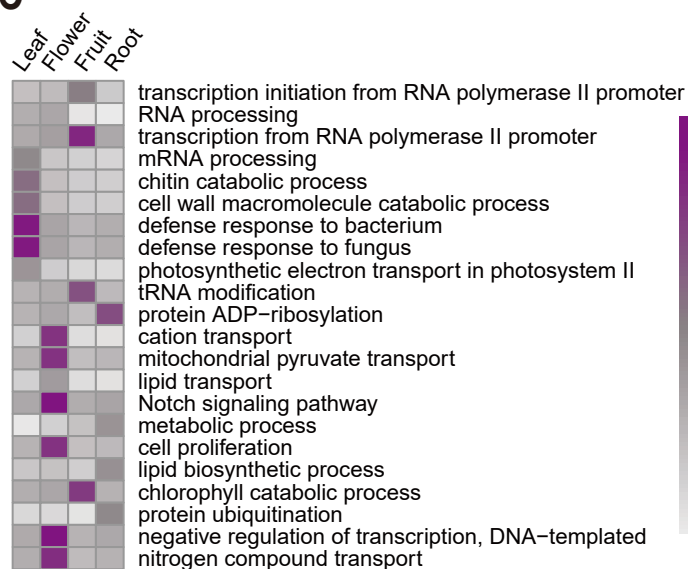**D**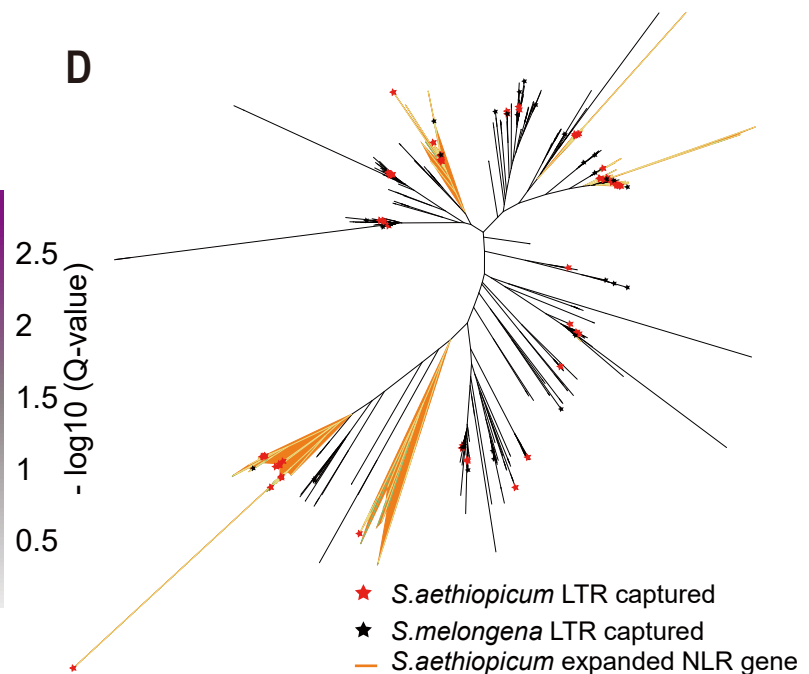

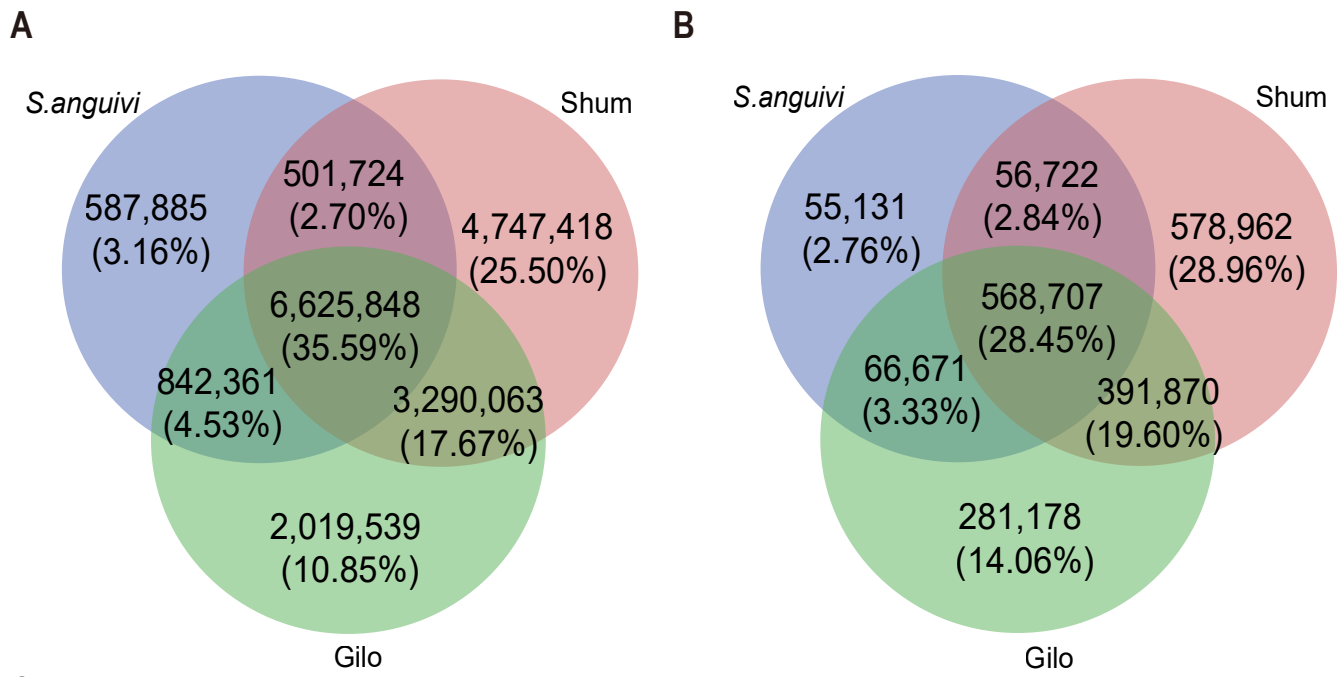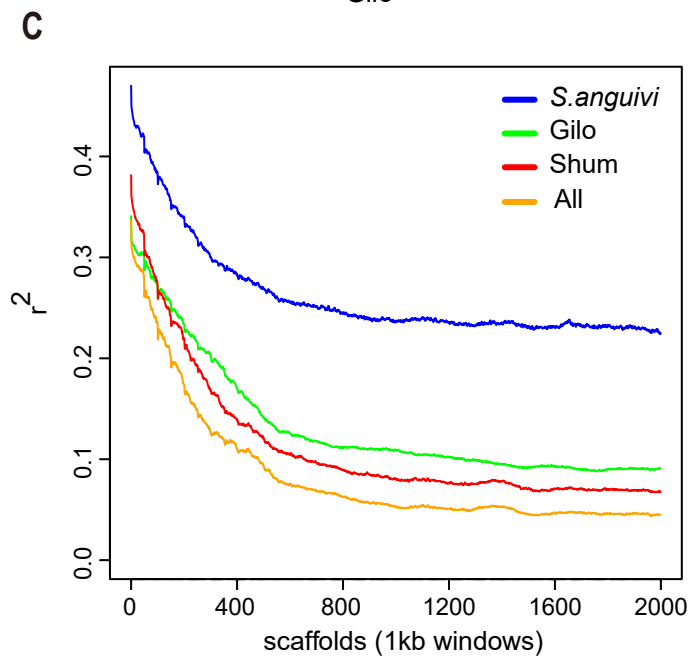



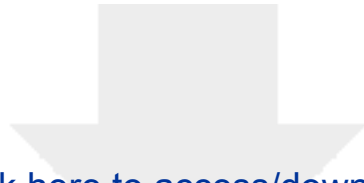

Click here to access/download  
**Supplementary Material**  
Supplementary Tables 1.docx

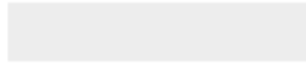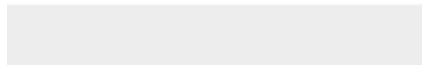



Click here to access/download  
**Supplementary Material**  
Supplementary Tables 2.xlsx

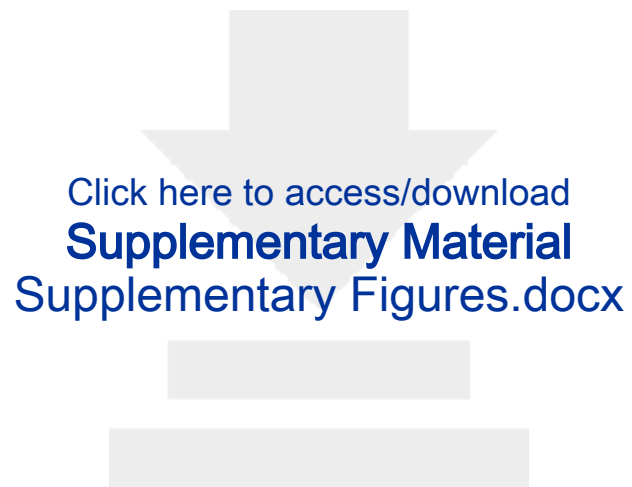

Supplement: giz115_giga-d-19-00026_revision_1.pdf [file giz115_giga-d-19-00026_revision_1.pdf]
