# Supplementary material for: Draft genome sequence of Solanum aethiopicum provides insights into disease resistance, drought tolerance, and the evolution of the genome
Source: PubMed Central journal article supplement (PMC6771550; doi:10.1093/gigascience/giz115), 2019-10-01
Supplement: giz115_response_to_reviewer_comments_original_submission.pdf [file giz115_response_to_reviewer_comments_original_submission.pdf]

## Author's Response To Reviewer Comments

Close

### Reviewer reports:

Reviewer #1: The manuscript entitled "Draft genome sequence of the *Solanum aethiopicum* provides insight into disease study of *Solanum aethiopicum*, a close relative of the cultivated eggplant *Solanum melongena*. Methods are very appropriate to the aims of the study and conclusions are adequately supported by the genomic data.

Could you give more details about the method of:

- The high molecular genomic DNA extraction?

Response: More details and the cited reference were added.

- The selection of high-quality reads?

Response: Details have been added.

- The multiplexing? (barcoding?) and the demultiplexing?

Response: The delivered reads were already demultiplexed.

- The identification of collinearity blocks (parameters of MCscanX)?

Response: Changed to "... gene pairs in MCscanX with default parameters".

- The RNAseq read filtering and removing of low-quality reads (tools, parameters and threshold)?

Response: Details have been added in the text. "SOAPfilter software with the parameters "-M 2, -f 0, -p" was used to filter  $\geq 40\%$  low quality bases or with  $\geq 10\%$  uncalled bases ("N") were filtered."

- The variant calling pipeline? (default parameters in GATK for SNP and SV?)

Response: Yes, we used default parameters in GATK pipeline for SNP and SV identified. For quality control, parameters "G used. Detailed parameters have been added.

- The pan-genome reconstruction (parameters and threshold of SOAPdenovo2 and CD-HIT-EST)?

Response: We use SOAPdenovo2 and CD-HIT-EST software to construct pan-genome with default parameters.

### Minor comments:

- Could you describe the eggplant accession used to produce the genome assembly?

Response: A brief description had been added.

- You have used a substitution rate of  $1.3e-8$  year<sup>-1</sup>site<sup>-1</sup> based on works performed on rice genomes. Could you justify this? Response: Generally, the substitution rate varies little among different plants. For example, the substitution rate reported generation (Ossowski et al, 2010), which is quite close to that in rice. The use of the rate of rice enables the comparison between which the same substitution rate was used to infer the ages of LTRs (Kim et al., 2017).

- Could you perform a statistical test to validate the comparison of degeneration of LTR-R activities in different tissues?

Response: Unfortunately, statistical test is not allowed without replicates. Instead, we added regression onto the plots.

- An amplification of LTR is found in *Solanum aethiopicum* and also in *Solanum melongena*. Could you give us the reference?

Response: We searched for LTR in *S. melongena* genome (Hirakawa et al., 2014) in this study. A same method and criteria are comparable.

- The number of SNP seems huge. Could you compare with others plant genomes? (Yuan Fu)

Response: In this study, we had identified 18,614,838 SNPs in total. The number of SNP is highly dependent on the variations. Differences of genome sizes also contribute to the varied number of SNP in different species. Actually, it is not fair to compare populations. Take tomato, whose genome size (828 Mb) is comparable to *S. aethiopicum*, as an example, a number of 11. in a population of 360 accessions (Lin et al., 2014). Furthermore, it is not surprise to have such a large number of SNPs in (Lester et al., 1986).

- "Artificially selected genes", what does the term artificial mean? Could you explain/develop?

Response: It means the genes preferentially retained by human during the history of domestication.

- Numbers of accessory genes seem huge. Could you check if these values are not overestimate due to the presence of fragments?  
Response: The genome sequences per se varies greatly among different groups (Lester et al., 1986), several groups were sequenced. We cannot completely exclude the possibility of overestimation caused by the presence of fragmented genes, the degree of overestimation of accessory genes (921 bp) (Supplementary Table 20) is comparable to that of genes (1104 bp) (Supplementary Table 5) in other groups.

- "Good quality transcripts" ", what does the term good mean? Could you explain/develop?

Response: It has been rephrased to "The mapped reads were then assembled using StringTie"

- Could you justify the choice of e-value thresholds for gene annotations and gene clustering (1e-4 seems very weak)?

Response: The cutoff of 1e-4 was used for the identification of NLR. It is actually not that weak and had been used in many studies. Another reason we use this threshold is to make our results comparable to that reported in pepper (Kim et al., 2017), which used 1e-4.

- Could you explain acronyms (GENO, MAF, HWE)?

Response: The full names have been added in the manuscript. They are GENO: Maximum per-SNP missing, MAF: Minor allele frequency, HWE: Hardy-Weinberg equilibrium value.

Reviewer #2: This paper reports the first genome assembly of *Solanum aethiopicum*. The description is easy to follow and the data are available. I recommend the authors to submit the data (genome, genes, protein, annotation, sequence variations etc) to SRA to make them easily accessible.

Response: Thanks. That's a very good suggestion. We will arrange the submission upon the acceptance of the paper.

Minor comments:

The term "the reference genome" in the main text should be replaced by "the reference genome sequence".

Response: Replaced. Thanks.

Abstract: LTR-Rs should be spelled out.

Response: Replaced by "long terminal repeat retrotransposons (LTR-Rs)". Thanks. (P2, L12)

Abstract: "closely" is ambiguous.

Response: It is 150 kb. It had been indicated in the text.

Introduction: "We also re-sequenced two ...". Is this 65 (not two) as mentioned in Abstract and other parts?

Response: Changed to "two groups"

Data Description: While a total of 242.6 Gb raw reads were obtained, only 127.83 Gb were used for assembly. I assume that the quality of several of the libraries were poor at the beginning of this work, therefore we added more libraries.

Response: Yes, the quality of several of the libraries were poor at the beginning of this work, therefore we added more libraries.

Data Description: Only 80.4% complete BUSCOs were found in the assembly, whereas the total length of the assembly was 1.17 Gb. Please clarify the reason for the low BUSCOs. (Yuan Fu, please explain this)

Response: We won't deny that this assembly is only a draft and there must be some genes and sequences missed. In our previous studies, we used much more stringent criteria for gene annotation, compared to many other studies on Solanaceae genomes. For example, the genome of *Solanum melongena* has as many as 85,446 genes (Hirakawa et al, 2014). In fact, the scores of BUSCOs are not the only criteria for gene annotation. However, this will also include more inaccurate gene models. We had other version of gene models, hoping to removing false annotations as many as possible.

Increased resistance is facilitated by LTR-Rs amplification: What is the definition of "LTR-Rs captured"? It is unclear why the genes located in LTR-Rs are overrepresented by NLRs?

Response: The genes located in LTR-Rs were defined as LTR-Rs captured genes. It is likely that these genes were retrotransposon insertion sites. If these genes are overrepresented by NLRs, we speculate that they are beneficial to disease resistance.

Polymorphisms in different *S. aethiopicum* groups: What's the difference between indels and SVs?

Response: In this study, we follow the criteria described in the users' guide of GATK pipeline (version 4.0), in which SV is defined as short variants including small deletion or insertions.

Artificially selected genes in *S. aethiopicum*: What types of selections do the authors mention here?

Response: They are the genes preferentially retained by human during the domestication of this crop.

Potential implications: This part can be deleted because this is not based on the data.

Response: removed.

Methods: What are the "standard BGI protocols"?

Response: Changed to "The DNA was sheared into small fragments of ~ 200 bp and used to construct paired-end libraries (Wang et al., 2017) and subsequently sequenced on a BGI-500 sequencer. Briefly, the DNA fragments were ligated to BGISEQ-500 adapters. After PCR amplification, the products of which were then pooled and circularized for sequencing on BGISEQ-500 (BGI, Shenzhen, China)." (Wang et al., 2017)

SNP calling: "samtools mpileup" and "VariantFiltration" are duplicated.

Response: Corrected.

Reviewer #3: The manuscript describes a draft assembly and annotation for *S. aethiopicum* genome.

Authors estimated the repetitive elements content and proposed that two amplifications of LTR-Rs occurred around 1.25 million years ago. The authors also identified several disease resistance genes. Authors carried out also comparative genomics study in the Solanaceae family and inferred phylogenetic relationships between *S. aethiopicum* and LD.

Although *S. aethiopicum* is an orphan species and therefore I do not expect the use of the most advanced technologies for genome assembly with HiC, I would have expected at least the anchoring of scaffolds and contigs to pseudomolecules. I think that generating pseudomolecules is not difficult to obtain, which could be thus genotyped using any GBS approach authors want.

Response: These are very good suggestions. Unfortunately, we do not have extra budget for this at this moment. Of course, we will consider this once these data are available.

Although a pan genome of the species was also provided, I think that this paper is not suitable for the publication on this journal. Furthermore, the language needs tightening up and editing for English sense.

Response: The language has been polished.

More detailed comments

Abstract:

it is reported that the pan-genome of *S. aethiopicum* contains 1,345 genes are missing in the reference genome. I cannot find these genes.

Response: The figures in this part have been corrected. Now it has been changed to "A pan-genome of *S. aethiopicum* with 24,567 genes, of which 24,567 genes are missing in the reference genome sequence." It has also been added in the text.

Background

Line 8-10: I would add some extra reference to this part "It is reported to have medicinal value and its roots and fruits have been used to treat uterine complications in Africa" or clearly highlighted the information got from FAO. Furthermore, FAO should be added to the list of orphan crops.

Response: The publication of these orphan crops is very few, we could only find this information on the website of FAO ([http://www.fao.org/crops/africangardenegg/en/?amp%3Butm\\_medium=social%20media&%3Butm\\_campaign=unfaopinterest](http://www.fao.org/crops/africangardenegg/en/?amp%3Butm_medium=social%20media&%3Butm_campaign=unfaopinterest)), which had already been mentioned in the text.

Line 24 is (mansfeld.ipk-gatersleben.de). is it a reference for disease resistance? The link send to a database. I would change it to a more appropriate reference.

Response: The full address is [http://mansfeld.ipk-gatersleben.de/apex/f?p=185:46:448783208481::NO:::module,mf\\_use,source,akzanz,rehm,akzname,taxid:mf,,botnam,0](http://mansfeld.ipk-gatersleben.de/apex/f?p=185:46:448783208481::NO:::module,mf_use,source,akzanz,rehm,akzname,taxid:mf,,botnam,0) which is too long and only the website of home page was shown.

Now, we changed it to "Aculeatum is used as ornamentals (Prohens et al., 2012; Plazas et al., 2014) or rootstocks (mansfeld et al., 2014) for its disease resistance nature (Toppino et al., 2008)"

line 28: please provide at least a reference for this part: "S. aethiopicum is the second most cultivated eggplant, as an "orphan crop".

Response: This statement has been changed to "Although *S. aethiopicum* is one of the most important cultivated eggplants, its breeding and breeding investments are substantially lagging behind in comparison with other Solanaceae relatives such as tomato, eggplant, and pepper."

Line 40 : the sentence on genome editing sound to me a little bit out of place, as no information on genome editing in *S. aethiopicum* is provided. genome editing might be used for breeding.

Response: We noticed that there is no report of genome editing in *S. aethiopicum* so far. This is because very few efforts on genome editing techniques, just like many other advanced techniques, can eventually be applied into this species to speed the progress of genome editing. genome editing of *S. aethiopicum* would be very essential for the identification of genes to be edited, as well as for the design of guide RNAs. This is because genome editing on *Physalis pruinose*, another orphan crop also in Solanaceae (Lemmon et al., 2018. Nat. Plants), before which there is no report of genome editing.

Data description:

I would modify "with a genome size of 1.17 Gb" with "expected genome size". You would get a more precise estimate using the expected genome size.

Response: Changed.

Furthermore, authors generated more than 242Gb of data, but after cleaning, about 50% of the data (128GB) were used presumably may explain the number of scaffolds obtained (more than 162k). Did the authors filter for scaffolds' size? Did other tools, like SOAP? Any comments?

Response: Yes, the quality of several of the libraries were poor, therefore we added more libraries to make sure the final genome using other tools including SOAPdenovo and selected the best assembly for downstream analyses. The assembler bp, and all the resulted scaffolds were retained.

Line 33-39. This sentence "Among these annotated TEs, LTR-Rs were extraordinarily abundant and occupied 719 Mbp, accounted for 1.2% of the genome, and were primarily composed of LINEs and SINEs (Supplementary Table S4)." is a repetition of what said at the beginning of the paragraph. I will combine them.  
Response: We have deleted this sentence. Thanks.

Line 42 Section protein coding. From table S5 gene features are not so similar to other genomes, especially Pepper and Arabidopsis genes? The gene number from Kim et al. 2017 is 35,884

Response: Arabidopsis is relatively distant to *S. aethiopicum*. As for the data of Pepper, the data in this table was collected from a different study. The total of 45,131 protein-coding genes. The data now has been replaced by Kim's data (Kim et al, 2017).

Section Amplification of LTR-Rs:

\* please add references here "The proportion of Ty3/Gypsy and Ty1/Copia LTR-Rs in *S. aethiopicum* is also comparable to other species.  
Response: The references were added. The sentence was rephrased to "The proportion of Ty3/Gypsy in *S. aethiopicum* is 87.7% of Ty3/Gypsy in hot pepper)".

\* Line 19: In this part "they occurred separately in each genome since *S. aethiopicum* and hot pepper had split about 20 million years ago"

---
